1                   **A non-canonical role for dynamin-1 in regulating early stages of**  
2                   **clathrin-mediated endocytosis in non-neuronal cells**

3  
4  
5       Saipraveen Srinivasan\*<sup>1</sup>, Christoph J. Burckhardt\*<sup>1,2</sup>, Madhura Bhave<sup>1</sup>, Zhiming Chen<sup>1</sup>, Ping-  
6       Hung Chen<sup>1</sup>, Xinxin Wang<sup>1,2</sup>, Gaudenz Danuser<sup>1,2</sup> and Sandra L. Schmid<sup>1,3</sup>

7  
8                   <sup>1</sup>Department of Cell Biology and <sup>2</sup>Lyda Hill Department of Bioinformatics,  
9                   UT Southwestern Medical Center, Dallas TX 75390

10  
11       \* These authors contributed equally

12       <sup>3</sup> To whom correspondence should be addressed:

13                   [sandra.schmid@utsouthwestern.edu](mailto:sandra.schmid@utsouthwestern.edu)

14                   Phone: 214-648-3941

15  
16       Running Title: Dynamin-1 regulates clathrin-mediated endocytosis

17

18 **Abstract**

19           Dynamins GTPases are best studied for their role in the terminal membrane fission  
20 process of clathrin-mediated endocytosis (CME); but, they have also been proposed to regulate  
21 earlier stages of CME. Although highly enriched in neurons, dynamin-1 (Dyn1) is, in fact, widely  
22 expressed along with dynamin-2 (Dyn2), but inactivated in non-neuronal cells via  
23 phosphorylation by GSK3 $\beta$  kinase. Here, we study the differential, isoform-specific functions of  
24 Dyn1 and Dyn2 as regulators of CME. Endogenously expressed Dyn1 and Dyn2 were  
25 fluorescently-tagged either separately or together in two cell lines with contrasting Dyn1  
26 expression levels. By quantitative live cell dual and triple-channel total internal reflection  
27 fluorescence microscopy we find that Dyn2 is more efficiently recruited to clathrin-coated pits  
28 (CCPs) than Dyn1, and that Dyn2, but not Dyn1 exhibits a burst of assembly prior to CCP  
29 formation. Activation of Dyn1 by acute inhibition of GSK3 $\beta$  results in more rapid endocytosis of  
30 transferrin receptors, increased rates of CCP initiation and decreased CCP lifetimes, but did not  
31 significantly affect the extent of Dyn1 recruitment to CCPs. Thus, activated Dyn1 can regulate  
32 early stages of CME even when present at low, substoichiometric levels relative to Dyn2, and  
33 apparently without assembly into supramolecular collar-like structures. Under physiological  
34 conditions Dyn1 is activated downstream of EGF-receptor signaling to alter CCP dynamics. We  
35 identify sorting nexin 9 (SNX9) as a preferred binding partner to activated Dyn1 that is partially  
36 required for Dyn1-dependent effects on early stages of CCP maturation. Together, we decouple  
37 regulatory and scission functions of dynamins and report a scission-independent, isoform-  
38 specific regulatory role for Dyn1 in clathrin-mediated endocytosis.

39

## 40 Introduction

41 Endocytosis has continued to evolve from a simple mode of ingestion and  
42 compartmentalization into a complex multicomponent process that developed a bi-directional  
43 relationship with surface signaling [1, 2]. In particular, evolutionary steps towards this  
44 complexity, which are associated with multicellularity, include the expansion to multiple isoforms  
45 of endocytic accessory proteins [3, 4], and the introduction of dynamin [4, 5].

46 Dynamin is the prototypical member of a family of large GTPases that catalyze  
47 membrane fission and fusion [6-8]. While encoded by single genes in *Drosophila* and *C.*  
48 *elegans*, further expansion of endocytic dynamins to three differentially-expressed isoforms  
49 occurred in vertebrates [9]. Dynamin-1 (Dyn1), the first identified vertebrate isoform, has been  
50 extensively studied and its mechanism of action as a fission GTPase is well understood [6, 8,  
51 10]. The three dynamin isoforms are >70% identical in sequence, with most differences  
52 occurring in the C-terminal proline/arginine rich domain (PRD) that mediates interactions with  
53 numerous SH3 domain-containing binding partners. Dyn1 and Dyn3 appear to be functionally  
54 redundant [11]. However, Dyn2 is unable to substitute fully for Dyn1 or Dyn3 in supporting rapid  
55 synaptic vesicle recycling in neurons [12] and correspondingly, Dyn1 could not fully substitute  
56 for Dyn2 to support CME in fibroblastic cells, even when overexpressed [13]. A direct  
57 comparison of the biochemical properties of Dyn1 and Dyn2 revealed differences in their *in vitro*  
58 curvature generating abilities: Dyn1 can potently induce membrane curvature and independently  
59 catalyze vesicle release from planar membrane surfaces, whereas Dyn2 requires the synergistic  
60 activity of curvature-generating BAR domain-containing proteins [14, 15].

61 Less understood, and still controversial [7, 16-18] is dynamin's suggested role in  
62 regulating early stages of clathrin-mediated endocytosis (CME) [19-22]. Based on their  
63 differential biochemical properties, it was suggested that Dyn1 might be a more effective fission  
64 GTPase, while Dyn2 might be positioned to regulate early stages of CME [14]. However,  
65 whether dynamin isoforms play distinct roles in regulating CME has not been studied.

66 Previously assumed to be neuron specific, recent studies have provided strong evidence  
67 that Dyn1 is indeed widely expressed, but maintained in an inactive state in non-neuronal cells  
68 through phosphorylation at S774 by the constitutively active kinase, GSK3 $\beta$  [23]. Acute  
69 inhibition of GSK3 $\beta$  in retinal pigment epithelial (ARPE) cells accelerates CME due to increased  
70 rates of clathrin-coated pit (CCP) initiation and maturation [23]. The effects of GSK3 $\beta$  inhibition  
71 on CME depend on Dyn1, but not Dyn2, suggesting, unexpectedly, that Dyn1 might selectively  
72 function to regulate early stages of CME in non-neuronal cells. As the GSK3 $\beta$  phosphorylation  
73 site, Ser774, is located within the PRD, its phosphorylation is presumed to alter interactions with

74 dynamin's SH3 domain-containing binding partners, as has been shown for binding partners  
75 enriched in the synapse [24, 25]. Which interactions are affected in non-neuronal cells and  
76 whether these might be dynamin isoform-specific is not known.

77 Immuno-electron microscopic studies using an antibody that recognizes both Dyn1 and  
78 Dyn2, have localized endogenous dynamin to both flat and deeply invaginated CCPs in A431  
79 adenocarcinoma cells [26, 27]. Live-cell imaging has shown that, when overexpressed, both  
80 Dyn1-eGFP and Dyn2-eGFP are recruited at low levels to nascent CCPs, that their association  
81 with CCPs fluctuates and that they undergo a burst of recruitment prior to membrane scission  
82 and vesicle release [17, 22, 28-31]. Indeed, when compared directly, transiently overexpressed  
83 Dyn1- and Dyn2-EGFP had indistinguishable profiles for their recruitment to CCPs [30, 31].  
84 Analysis of the recruitment of genome-edited Dyn2-eGFP to CCPs has similarly revealed a  
85 burst of recruitment at late stages of CME, as well as more transient interactions of lower  
86 numbers of Dyn2 molecules during earlier stages of CCP maturation [17, 32]. To date, direct  
87 and quantitative comparisons of the nature of Dyn1 and Dyn2 association with CCPs when they  
88 are expressed at endogenous levels do not exist. Nor is it known how activation of Dyn1 affects  
89 its association with CCPs.

90 Here we explore the isoform-specific behaviors of genome-edited Dyn1 and Dyn2, both  
91 at steady-state and in cells where Dyn1 is activated. We provide evidence for an early function  
92 of low levels of activated Dyn1 in regulating CCP initiation and maturation rates and that sorting  
93 nexin 9 (SNX9) serves as an isoform-selective, and activity-dependent binding partner of Dyn1  
94 to regulate CCP maturation. Finally, we show that Dyn1 can be activated, under physiological  
95 conditions, downstream of epidermal growth factor receptors (EGFRs) to alter CCP dynamics.

96

## 97 **Results**

98

### 99 *Dynamin isoforms are differentially recruited to clathrin coated pits*

100 Recent studies have shown that Dyn1 is widely expressed in non-neuronal cells [2]; but,  
101 like at the neuronal synapse [33], it is mostly inactive at steady state due to phosphorylation by  
102 the constitutively active kinase GSK3 $\beta$ . Dyn1 function and its recruitment to CCPs have been  
103 studied in non-neuronal cells, albeit under conditions of overexpression and/or without an  
104 awareness of its phospho-regulation [14, 21]. Therefore, to explore potential isoform-specific  
105 functions of Dyn1 and Dyn2, as well as the role of GSK3 $\beta$  in regulating Dyn1 activity, we  
106 generated genome-edited H1299 non-small cell lung cancer cells, which we previously showed

107 partially utilize Dyn1 for CME [23]. Cells expressing endogenously-tagged Dyn2-mRuby were  
108 generated using previously validated Zinc Finger Nucleases (ZFN) [32, 34] to introduce double  
109 stranded breaks and insert the mRuby tag with complementary flanking regions by homology  
110 driven repair (**Fig 1A**). The resulting cells were single cell sorted for mRuby2 fluorescence to  
111 obtain a heterozygous clone (clone 235, designated Dyn2-mRuby<sup>end</sup>) expressing a single  
112 mRuby-tagged allele of Dyn2 (**Fig 1B**).

113 Endogenously tagging Dyn1 was complicated by the fact that the DNMI1 gene encodes  
114 C-terminal splice variants derived from differential splicing of exons 21 and 22 (**Supplemental**  
115 **Fig S1a**), whose differential utilization could lead to partial loss of the fusion tag. Previous  
116 studies involving CRISPR/Cas9-mediated knockout and reconstitution with the Dyn1a C-  
117 terminal splice variant had confirmed that it fully reconstituted the GSK3 $\beta$  phospho-regulated  
118 activity of endogenous Dyn1 in H1299 cells [23], including its ability to be activated by  
119 calmodulin [35]. Therefore, using a CRISPR/Cas9n nickase strategy, we targeted the Dyn1  
120 gene at the end of exon 21, and introduced sequences encoding for the remaining 19 amino  
121 acids of the Dyn1a isoform, followed by a seven amino acid linker [32], monomeric eGFP fusion  
122 tag with stop codon and finally the SV40 polyadenylation signal to ensure unique expression of  
123 the 'a' splice variant (**Fig 1A and Supplemental Fig S1**). Single cell sorting by FACS for eGFP  
124 fluorescence, followed by clonal amplification generated a heterozygous clone (clone 1B6,  
125 designated Dyn1a-eGFP<sup>end</sup>) expressing one eGFP-tagged allele of Dyn1a (**Fig 1B**). Note that  
126 although Dyn1 is expressed at very low levels in H1299 cells, it can be readily detected  
127 following enrichment by amphiphysin-II SH3 domain pulldown.

128 As a robust fiduciary marker for CCPs, clathrin light chain a (CLCa) carrying an N-  
129 terminal SNAP-fusion tag was stably introduced in parallel into both cell lines via a lentiviral  
130 vector with puromycin selection of SNAP-CLCa expressing cells. As previously reported by  
131 several groups, mild overexpression of FP-CLCa has no effect on CME as measured by  
132 transferrin endocytosis [22, 31, 32, 36], and no effect on CCP dynamics compared to AP2 or  
133 other markers [20, 29, 31]. We then performed live cell dual-channel total internal fluorescence  
134 microscopy (TIRFM) and analyzed CCP dynamics and Dyn-recruitment using the master  
135 (CLCa) – slave (Dyn) approach introduced with the cmeAnalysis software [22, 37, 38].

136 As expected based on previous studies using either overexpressed [28, 29, 31] or  
137 endogenously tagged Dyn2 [17, 22, 32], Dyn2-mRuby<sup>end</sup> was observed, on average, to  
138 gradually accumulate and then exhibit a burst of recruitment coincident with CCV release. This  
139 can be seen in class averaged tracks of bona fide CCPs with lifetimes ranging from 40-60 sec  
140 (**Fig 1 C, D**), and in all other CCP lifetime cohorts (**Supplemental Fig S2A,B, Supplemental**

141 **movie 1**). In contrast, Dyn1a-eGFP<sup>endo</sup> recruitment was barely detectable above background  
142 and no burst was evident (**Fig 1E,F, Supplemental Fig S2C,D, Supplemental movie 2**). This  
143 could reflect either isoform-specific differences, very low levels of Dyn1 expression relative to  
144 Dyn2, and/or the inactivation of Dyn1 by GSK3 $\beta$  phosphorylation. Thus, we further explored  
145 these possibilities.

146

147 *Inhibition of constitutively active GSK3 $\beta$  kinase stimulates Dyn1 to accelerate CCP initiation and*  
148 *maturation*

149 We first tested whether activation of Dyn1 alters CCP dynamics and/or the recruitment of  
150 Dyn1a-eGFP<sup>endo</sup> in H1299 cells. As expected based on earlier studies in ARPE cells [23], we  
151 confirmed that acute inhibition of GSK3 $\beta$  by incubation with the specific inhibitor, CHIR99021,  
152 leads to decreased phosphorylation of Dyn1 at Ser774 within 30 minutes (**Fig. 2A, B**) and  
153 increased rates of CME, as measured by transferrin receptor (TfnR) internalization (**Fig. 2C**).  
154 Importantly, the effects of GSK3 $\beta$  inhibition were dependent on Dyn1 expression, as treatment  
155 of Dyn1 knockout (Dyn1<sup>KO</sup>) H1299 cells [23] with CHIR99021 had no effect on CME (**Fig. 2C**).

156 To further probe the mechanism by which activated Dyn1 accelerates CME, we  
157 introduced mRuby2 labeled CLCa into H1299 parent Dyn1<sup>KO</sup> cells and measured CCP  
158 dynamics by TIRFM. Analysis of the rates of assembly and departure of CCPs revealed that  
159 GSK3 $\beta$  inhibition resulted in a significant increase in the rate of coated pit initiation per unit cell  
160 area (**Fig. 2D**), as well as an increase in maturation rates (i.e. decrease in lifetimes) of CCPs  
161 (**Fig. 2E**). The latter was evident in the change in lifetime distribution of all bona fide CCPs (**Fig**  
162 **2F**), which displayed a more quasi-exponential profile than untreated cells, indicative of a less  
163 regulated process during early stages of CCP maturation [22]. Importantly, similar effects were  
164 observed for H1299 Dyn1a-eGFP<sup>end</sup> (**Supplemental Fig S3A-C**), confirming that the C-  
165 terminally eGFP-tagged splice variant, Dyn1a, was fully functional and activated by de-  
166 phosphorylation. Again, GSK3 $\beta$  inhibition had no effect on CCP initiation rates or lifetimes in  
167 H1299 Dyn1<sup>KO</sup> cells (**Fig 2 G-I**), confirming that these changes in CCP dynamics are a result of  
168 activation of Dyn1.

169 We then asked whether GSK3 $\beta$  inhibition and activation of Dyn1 altered its recruitment  
170 to CCPs. Surprisingly, there was no significant difference in the average recruitment intensity  
171 (**Fig 2J**) of Dyn1 at CCPs. Previous studies had shown that the appearance of dynamin  
172 fluctuates at CCPs [21, 32], thus it was possible that GSK3 $\beta$  inhibition induces asynchronous  
173 and transient appearances of Dyn1 at CCPs that could be obscured by measuring average  
174 recruitment. Therefore, we also quantified the maximum intensity of Dyn1 recruited at any time

175 along a CCP track. Using this orthogonal measurement, we again, saw no effect of GSK3 $\beta$   
176 inhibition on Dyn1 recruitment to CCPs (**Fig 2K**). Together these data suggest that  
177 dephosphorylation and activation of Dyn1 can alter CCP dynamics and CME even when Dyn1 is  
178 present at low amounts, and that the effects of activation of Dyn1 on CCP dynamics, are not  
179 likely explained simply by its increased recruitment to CCPs.

180

### 181 *Sub-stoichiometric levels of Dyn1 are sufficient to stimulate CCP dynamics*

182 It remained possible that the extremely low expression levels of Dyn1 in H1299 might  
183 limit our ability to detect GSK3 $\beta$ -dependent changes in its recruitment. To test this, we stably  
184 overexpressed Dyn1a<sup>WT</sup>-eGFP in H1299 Dyn1<sup>KO</sup> cells at ~20-fold levels higher than  
185 endogenous to generate Dyn1a<sup>WT</sup>-eGFP<sup>OX</sup> cells (**Fig 3A**). Importantly, overexpression of  
186 Dyn1a<sup>WT</sup>-eGFP, itself, did not result in any additional increase in TfnR uptake compared to the  
187 normal low endogenous levels (**Fig 3B**, see also Fig. 4G). However, as in parental and genome-  
188 edited H1299 cells, acute GSK3 $\beta$  inhibition in the Dyn1a<sup>WT</sup>-eGFP<sup>OX</sup> cells resulted in increased  
189 rates of TfnR uptake (**Fig 3B**) and alterations in CCP dynamics, including increased rates of  
190 CCP initiation and maturation (**Fig 3C-E**). Yet, similar to the Dyn1a-eGFP<sup>end</sup>-cells, GSK3 $\beta$   
191 inhibition did not result in significantly enhanced recruitment of Dyn1a<sup>WT</sup>-eGFP to the  
192 membrane, either on average (**Fig 3F,G**) or when measured as maximum peak intensity (**Fig**  
193 **3H**). Moreover, there was no evidence of a burst of Dyn1 recruitment prior to CCV formation  
194 (**Fig 3G**). Together these results suggest that the observed changes in CCP dynamics are the  
195 result of a scission-independent, early role for low levels of Dyn1 in regulating CME.

### 196 *Dephosphorylated Dynamin 1 regulates early stages of CME*

197 Based on our finding that Dyn1 expression is required for the inhibitory effects of GSK3 $\beta$   
198 on CME, we hypothesized that dephosphorylation of residues in Dyn1's PRD should be  
199 sufficient to enhance CME efficiency. To test this, we introduced point mutations in Dyn1 at the  
200 serine residue phosphorylated by GSK3 $\beta$  (S774) and at the priming serine site that is  
201 responsible for recruiting GSK3 $\beta$  (S778). We expressed this mutant as an eGFP fusion in  
202 H1299 cells, Dyn1a<sup>S774/8A</sup>-eGFP, at comparable levels to Dyn1a<sup>WT</sup>-eGFP (**Fig 3A**). As predicted,  
203 Dyn1<sup>S774/8A</sup>-eGFP cells exhibited increased rates of CCP initiation (**Fig 4A**), decreased CCP  
204 lifetimes (i.e. increased rates of CCP maturation, **Fig 4B**) and changed the lifetime distribution  
205 to a quasi-exponential profile (**Fig 4C**). From these data, we conclude that dephosphorylated  
206 Dyn1 is sufficient to account for the effects of GSK3 $\beta$  inhibition on CCP dynamics.

207 Surprisingly, even the nonphosphorylatable Dyn1a<sup>S774/8A</sup>-eGFP mutant was not efficiently  
208 recruited to CCPs and failed to display a pronounced late burst of recruitment accompanying  
209 membrane scission (**Fig 4D-F**). Interestingly, the changes in CCP dynamics in Dyn1a<sup>S774/8A</sup>-  
210 eGFP expressing cells were not reflected in significantly increased rates of TfnR uptake,  
211 presumably due to compensatory changes that occur upon prolonged expression of activated  
212 Dyn1 vs. acute activation (**Fig. 4G**). However, unlike parental H1299 cells or Dyn1a<sup>WT</sup>-eGFP  
213 cells, Dyn1<sup>KO</sup> cells reconstituted with Dyn1a<sup>S774/8A</sup>-eGFP exhibited significant residual levels of  
214 TfnR uptake upon siRNA knockdown of Dyn2 (**Fig 4G**), consistent with functional activation of  
215 Dyn1. Moreover, upon siRNA knockdown of Dyn2, even Dyn1a<sup>WT</sup>-eGFP tended to exhibit a  
216 burst of recruitment prior to CCV formation (**Fig 4H,I**), suggesting its activation as part of a  
217 compensatory mechanism to restore CME [23]. Under these conditions, GSK3 $\beta$  inhibition  
218 appears to enhance the burst of Dyn1a<sup>WT</sup>-eGFP recruitment prior to scission (**Fig 4H,I**).

219 From these data, we conclude that Dyn1 is negatively regulated in non-neuronal cells  
220 through GSK3 $\beta$ -dependent phosphorylation of S774, and that dephosphorylated, active Dyn1  
221 regulates early stages of CME even when present at low (nearly undetectable, in the case of  
222 parental H1299 cells) levels on CCPs. Importantly, overexpressed Dyn1, even when activated  
223 by mutation or GSK3 $\beta$  inhibition (**Fig. 3B**) does not fully compensate for loss of Dyn2 function in  
224 CME, hence both isoforms have partially divergent functions.

225

226 *A549 cells express high levels of Dyn1 that can partially substitute for Dyn2*

227 We previously reported that several lung cancer cell lines express high levels of Dyn1  
228 [35, 39]. For example, A549 non-small cell lung cancer cells express ~5-fold higher levels of  
229 Dyn1 than Dyn2 [39], corresponding to ~20-fold higher levels of Dyn1 than in H1299 cells  
230 (**Supplemental Fig S4A**). Reflective of these high levels of Dyn1 expression, siRNA knockdown  
231 of both Dyn1 and Dyn2 is necessary for potent inhibition of TfnR uptake in A549 cells  
232 (**Supplemental Fig S4B**). Therefore, we reasoned that it might be possible to individually  
233 knockout Dyn1 and Dyn2 in A549 cell lines for reconstitution experiments. Thus, we used  
234 CRISPR/Cas9n to generate a complete knockout of Dyn1 (Dyn1<sup>KO</sup>) or Dyn2 (Dyn2<sup>KO</sup>) in A549  
235 cells (**Fig. 5A, Supplemental Fig S4C**) and then introduced mRuby-CLCa to track CCP  
236 dynamics. Acute inhibition of GSK3 $\beta$  had no effect on the rates of CCP initiation or maturation in  
237 Dyn1<sup>KO</sup> A549 cells, but significantly stimulated the rate of CCP initiation and decreased the  
238 lifetimes of CCPs in Dyn2<sup>KO</sup> A549 cells (**Fig 5B,C**). These data show that the two isoforms  
239 differentially regulate early stages of CME and confirm that the effects of GSK3 $\beta$  inhibition on  
240 CME depend on Dyn1, but not Dyn2.



241 To directly and quantitatively compare the relative recruitment efficiencies of the two  
242 isoforms to CCPs, we reconstituted these knockout cells with their respective eGFP-tagged  
243 isoforms and sorted for expression comparable to their endogenous levels (i.e. in these A549  
244 cells we chose cells in which Dyn1a-eGFP levels were ~5-fold higher than Dyn2-eGFP) (**Fig**  
245 **5A**). Additionally, we introduced SNAP-CLCa and mRuby2-CLCa in Dyn1a-eGFP and Dyn2-  
246 eGFP cells, respectively so that we could distinguish the two A549 cell lines (i.e. Dyn1<sup>KO</sup>:Dyn1a-  
247 eGFP:SNAP-CLCa from Dyn2<sup>KO</sup>:Dyn2-eGFP:mRuby2-CLCa) while imaging them in the same  
248 TIRF field of view, under the same conditions (**Fig 5D**). These data directly show the differential  
249 recruitment efficiencies of Dyn1 and Dyn2 to CCPs. Live cell imaging revealed the typical  
250 gradual accumulation and burst of Dyn2-eGFP recruitment to CCPs when averaged over the  
251 cohort of 40-60s lifetime CCPs (**Fig 5E**). However, under identical imaging conditions of the  
252 same fluorophore, Dyn1a-eGFP was recruited, on average at least 10-fold less efficiently, even  
253 though it is expressed at higher abundance. The maximum intensity of tagged Dyn2 vs Dyn1  
254 recruitment was also higher, albeit showing only an ~3-fold differential (**Fig 5F**). A likely  
255 explanation for the differences in average and peak measurements is that in A459 cells, Dyn1a-  
256 eGFP does display a slight burst of recruitment at late stages of CCV formation that is visible  
257 when the Dyn1 signal is rescaled (**Supplemental Fig S4D**).

258 Finally, to verify our results using an independent method, we performed Western  
259 blotting after subcellular fractionation and isolation of membrane vs. cytosolic fractions, as  
260 verified using membrane-associated TfnR and cytosolic MEK1/2 as markers (**Fig 5G**). Under  
261 these fractionation conditions, ~90% of Dyn2 is membrane associated, whereas only 50% of  
262 Dyn1 sediments with the membrane fraction (**Fig 5G**). We observed a consistent, ~20%  
263 increase of membrane-associated Dyn1 upon GSK3 $\beta$  inhibition that was not detected by  
264 TIRFM. These biochemical data indicate a greater extent of membrane association of both  
265 active and inactive Dyn1 than detected at CCPs by TIRFM. The differences could reflect  
266 recruitment of Dyn1 to sites on the plasma membrane other than CCPs, as has been previously  
267 reported [40]. The ~20% increase in recruitment of activated Dyn1 likely reflects the increase in  
268 number of CCPs that occurs upon GSK3 $\beta$  inhibition, rather than an increase in Dyn1 per CCP.  
269 Consistent with TIRFM data, the distribution of phosphorylated Dyn1 (detected with an S774  
270 phospho-specific antibody) was indistinguishable from total Dyn1 (i.e. there was no de-  
271 enrichment of phosphorylated Dyn1 in the membrane-bound fractions). These data confirmed  
272 that dephosphorylation of Dyn1 on S774 by GSK3 $\beta$  inhibition does not enhance its recruitment  
273 to CCPs. Thus, the effects of activated Dyn1 on CCP initiation and maturation occur either

274 independently of its direct association with CCPs, or, more likely, are manifested by very low  
275 levels of CCP-associated dephosphorylated Dyn1.

276

### 277 *Dyn1 and Dyn2 do not efficiently co-assemble*

278 Dynamin exists as a tetramer in solution [41, 42] and assembles into higher order helical  
279 oligomers on the membrane. Exploiting Dyn1<sup>KO</sup> and Dyn2<sup>KO</sup> A549 cells reconstituted with  
280 Dyn1a- or Dyn2-eGFP, respectively, we next assessed the degree to which Dyn1 and Dyn2  
281 form hetero-tetramers in solution. Dyn1- or Dyn2-eGFP were efficiently immunoprecipitated with  
282 anti-eGFP nanobodies and the immunobeads were washed with 300 mM salt to disrupt any  
283 potential higher order dynamin assemblies before measuring the fraction of Dyn2 or Dyn1 that  
284 co-precipitated. Under these conditions we pulled down nearly 100% of the eGFP-tagged  
285 dynamins, but only ~30% of Dyn2 with Dyn1-eGFP and <5% of Dyn1 with Dyn2-eGFP  
286 (**Supplemental Fig S5A**). The difference in the extent of hetero-tetramerization is consistent  
287 with the ~5-fold higher levels of expression of Dyn1 vs Dyn2 in these cells. Thus, the two  
288 isoforms predominantly exist as homo-tetramers in solution.

289 We also examined the relative abilities of Dyn1 and Dyn2 to co-assemble into higher  
290 order structures *in vitro*. For this we used a dominant-negative Dyn1 mutant (Dyn1<sup>S45N</sup>)  
291 defective in GTPase activity, which when co-assembled with wild-type dynamin into higher order  
292 oligomers on lipid nanotubes will inhibit total assembly-stimulated GTPase activity through the  
293 intercalation of GTPase-defective subunits adjacent to wild-type subunits [43, 44]. As expected,  
294 Dyn1<sup>S45N</sup> efficiently co-assembles with Dyn1<sup>WT</sup> such that when present at equimolar levels the  
295 total assembly-stimulated GTPase activity is inhibited by 50%. In contrast, at the same  
296 concentrations of Dyn1<sup>S45N</sup>, Dyn2 GTPase activity was significantly less affected  
297 (**Supplemental Fig S5B**), indicating that Dyn2 less efficiently co-assembles into higher order  
298 oligomers with the mutant Dyn1. Thus, consistent with their differential recruitment to CCPs,  
299 even when present at comparable levels of expression in the same cell type, the two isoforms  
300 only weakly interact.

301

### 302 *Genome edited cells reveal that Dyn1 and Dyn2 are recruited to most CCPs in A549 cells*

303 Our results establish that Dyn1 and Dyn2 are differentially recruited to CCPs in non-  
304 neuronal cells, and that, on average, Dyn1 is recruited at much lower levels than Dyn2. Despite  
305 this, acute activation of Dyn1 globally alters CCP dynamics. Thus, we next directly compared  
306 the recruitment of Dyn1 and Dyn2 to CCPs to determine whether Dyn1 is recruited at low levels  
307 to all CCPs or instead might be recruited at higher levels to a subpopulation of CCPs. Such

308 heterogeneity would be lost by averaging. For this, we took advantage of the higher levels of  
309 Dyn1 expression in A549 cells and generated double genome-edited cells expressing Dyn1a-  
310 eGFP and Dyn2-mRuby. We first used ZFNs to generate Dyn2 mRuby2-edited A549 cells, and  
311 subsequently introducing a C-terminal eGFP to the Dyn1a splice variant using CRISPR/Cas9,  
312 as described earlier (**Fig. 1A**, see Methods). This yielded an A549 cell line homozygous for  
313 endogenously-tagged Dyn2-mRuby2 and heterozygous for endogenously-tagged Dyn1a-eGFP  
314 (2 of 3 Dyn1 alleles tagged in these triploid A549 cells) (**Fig 6A**). We confirmed that the double  
315 genome-edited cells exhibited comparable rates of TfnR uptake, as well as the degree of  
316 dependence on Dyn2 for CME, relative to the parent cells (**Fig 6B**). SNAP-CLCa was  
317 introduced into these cells by lentiviral transfection (**Fig. 6C**) and we confirmed that GSK3 $\beta$   
318 inhibition resulted in increased rates of CCP initiation, reduced CCP lifetimes and altered the  
319 lifetime distributions of CCPs (**Fig 6D-F**), as in the parental cells. Thus, the genome-edited Dyn  
320 isoforms were functionally active.

321 We next assessed the interplay between Dyn1a-eGFP and Dyn2-mRuby using three-  
322 color live-cell TIRFM imaging at 0.5 Hz (2s/frame) (**Fig 7A, Supplemental Movie S3**). As  
323 reported previously, we detected fluctuations of both Dyn1 and Dyn2 at CCPs over their  
324 lifetimes (examples shown in **Fig 7B**), and frequently detected a burst of Dyn2 just prior to CCV  
325 formation. In many cases we also detected a burst of Dyn1 recruitment, albeit to a lesser  
326 degree. For more quantitative analysis of these data, we applied the 3-channel functionality of  
327 our *cmeAnalysis* package to perform three-color master/slave analyses [22]. Using clathrin as  
328 the ‘master’ channel and Dyn1 and 2 as ‘slave’ channels, we determined whether the clathrin  
329 tracks contained either Dyn1, Dyn2, both or neither. Individual CCP tracks were considered  
330 positive for Dyn1 and/or Dyn2 if the intensities of Dyn1/2 signals detected at the position of the  
331 clathrin tag were significantly higher than the local Dyn1/2 background signal around the clathrin  
332 tag position for a period of time exceeding random associations, as previously described [22].  
333 This analysis revealed that in double genome-edited Dyn1a-eGFP<sup>end</sup>/Dyn2-mRuby<sup>end</sup> A549 cells  
334 both Dyn2 and Dyn1 could be robustly detected in ~75% of all bona fide CCPs (**Fig 8A**).  
335 Moreover, in this population of CCPs a clear burst of recruitment of both Dyn1a-eGFP and  
336 Dyn2-mRuby could be detected prior to CCV formation. Importantly, the apparently higher levels  
337 of recruitment of Dyn1-eGFP vs Dyn2-mRuby in these genome-edited cells is not a reflection of  
338 protein levels, but rather of imaging conditions and brightness for two different fluorophors  
339 (compare with **Fig 5E**). The remaining CCPs were roughly equally distributed as Dyn1 only,  
340 Dyn2 only and both Dyn1 and Dyn2 negative subpopulations (**Fig. 8A**). Note that the Dyn2  
341 levels in the “Dyn1 only” CCPs were still on average higher than background (Dyn1/Dyn2

342 negative), reflecting the stringency of our master/slave detection, and suggesting that Dyn2 is  
343 recruited to >90% of all CCPs, albeit to variable extents.

344 We next compared per-cell median lifetimes of CCPs relative to their dynamin isoform  
345 composition and found that CCPs bearing higher levels of Dyn2 and Dyn1 exhibited longer  
346 lifetimes (median ~80s) than single-positive CCPs (median ~38s) (**Fig. 8B**). CCPs that failed to  
347 detectably recruit either isoform were the shortest lived (median ~20s). These findings are  
348 consistent with previous data suggesting that a threshold level of Dyn2 recruitment is required  
349 for efficient CCP maturation [22, 34]. All of these CCP subpopulations, with the exception of the  
350 Dyn2 only CCPs, which nonetheless trended downwards, showed a significant decrease in CCP  
351 lifetimes upon inhibition of GSK3 $\beta$ , consistent with other data that only low levels of Dyn1 are  
352 required to alter CCP maturation.

353

354 *SNX9 is a required for activated Dyn1-dependent effects on CCP maturation*

355 Our findings thus far point to isoform-specific functions of Dyn1 and Dyn2 and hence  
356 suggest the existence of isoform-specific binding partners. Dyn1 and Dyn2 are >80% identical  
357 except for their C-terminal PRDs, which are only 50% identical and likely determine isoform-  
358 specific interactions with SH3 domain-containing proteins. The Dyn1<sup>KO</sup> and Dyn2<sup>KO</sup> A549 cells  
359 provide an opportunity to measure Dyn2 and Dyn1-dependent CME, respectively, without the  
360 possibility of compensation. Thus, we measured, by TfnR uptake, the effects of siRNA  
361 knockdown of several known SH3 domain containing binding partners on Dyn2-dependent CME  
362 in the Dyn1<sup>KO</sup> cells, and on Dyn1-dependent CME in the Dyn2<sup>KO</sup> cells. Knockdown of these  
363 dynamin partners has only mild effects on TfnR uptake in parental A549 cells and in Dyn1<sup>KO</sup>  
364 cells, whose endocytosis is exclusively Dyn2-dependent (**Fig. 9A**). Whether these mild effects  
365 reflect partial redundancy with other dynamin partners, activation of compensatory mechanisms  
366 [23], or that these factors, which were identified primarily as dynamin partners in brain lysates,  
367 play only minor roles in TfnR uptake in non-neuronal cells, cannot be discerned from these  
368 studies. Interestingly, siRNA knockdown of Grb2 appeared to inhibit TfnR uptake in Dyn1<sup>KO</sup> cells  
369 by ~20%, while not affecting TfnR uptake in either parental or Dyn2<sup>KO</sup> cells. This suggests that  
370 Grb2 might preferentially function together with Dyn2 in CME, and that its depletion in parental  
371 cells can be compensated for by Grb2-independent Dyn1 activity. In contrast, siRNA knockdown  
372 of SNX9 only mildly inhibited Dyn2-dependent TfnR uptake in parental A549 and had no  
373 significant effect on TfnR uptake in Dyn1<sup>KO</sup> cells, but decreased TfnR uptake in Dyn2<sup>KO</sup> cells by  
374 >50% (**Fig 9A**). Thus Dyn1-dependent endocytosis appears to be particularly sensitive to SNX9  
375 knockdown.

376 We next tested whether SNX9 preferentially interacts with Dyn1 vs Dyn2 by GFP  
377 pulldown assays using Dyn1<sup>KO</sup> and Dyn2<sup>KO</sup> A549 cells reconstituted with either Dyn1a<sup>WT</sup>- or  
378 Dyn1<sup>S774/8A</sup>-eGFP or with Dyn2-eGFP, respectively. Consistent with previous results [45, 46], we  
379 confirmed that SNX9 binds both Dyn1 and Dyn2 (**Fig 9B**). However, the ratio of SNX9 binding  
380 to Dyn1 vs Dyn2 was  $1.7 \pm 0.6$  (mean  $\pm$  sem, n=3), indicative of a slight preference for Dyn1.  
381 Importantly, SNX9 showed a marked preference for binding to the nonphosphorylated and  
382 active Dyn1<sup>S774/8A</sup>-eGFP. The ratio of SNX9 binding to Dyn1<sup>S774/8A</sup> vs Dyn1<sup>WT</sup> was  $3.6 \pm 0.9$  (mean  
383  $\pm$  sem, n=3). These data suggested that SNX9 might be a preferential functional partner of  
384 activated Dyn1.

385 We next asked whether SNX9-Dyn1 interactions were required for the effects of  
386 activated Dyn1 on CCP initiation rates, CCP maturation or both. For this we returned to the  
387 Dyn1<sup>KO</sup> H1299 cells reconstituted with Dyn1<sup>WT</sup> vs Dyn1<sup>S774/8A</sup> and tested whether the selective  
388 effects of Dyn1<sup>S774/8A</sup> on CCP dynamics (**Fig. 4A-C**) were dependent of SNX9. Knockdown of  
389 SNX9 decreased the rate of CCP initiation in Dyn1<sup>WT</sup>, but was not required for the enhanced  
390 rate of CCP initiation triggered by Dyn1<sup>S774/8A</sup> expression (**Fig. 9C**). Thus, other, yet unidentified  
391 binding partners are responsible for the Dyn1-dependent effect on CCP initiation. SNX9  
392 knockdown also led to an increase in the median CCP lifetimes in both Dyn1<sup>WT</sup> and Dyn1<sup>S774/8A</sup>  
393 expressing cells (**Fig. 9D**). These data suggest that SNX9 functions in both Dyn1-dependent  
394 and independent stages of CCP maturation. Consistent with this, SNX9 knockdown also  
395 abrogated the effects of Dyn1<sup>S774/8A</sup> expression on the lifetime distribution of bona fide CCPs  
396 (**Fig. 9E**), reverting the quasi-exponential distribution seen in Dyn1<sup>S774/8A</sup> to a distribution nearer  
397 to control. The strong effect of SNX9 knockdown is also seen in the rightward shift of the lifetime  
398 distribution of Dyn1<sup>WT</sup> cells treated with SNX9 siRNA. Together these data suggest multiple  
399 roles of SNX9 at multiple stages of CME, including the support of Dyn1's early functions in  
400 accelerating CCP maturation.

401

#### 402 *Dyn1 is activated downstream of the EGFR*

403 We have shown that strong pharmacological inhibition of GSK3 $\beta$  activates Dyn1 in non-  
404 neuronal cells and results in increased rates of CCP initiation and maturation, leading to  
405 increased rates of TfnR uptake via CME. However, it is not clear whether this regulatory effect  
406 on Dyn1 function modulates CME under more physiologically-relevant conditions. To test this,  
407 we treated serum-starved A549 cells with EGF, which is known to activate Akt and in turn to  
408 phosphorylate and inactivate GSK3 $\beta$  [47]. We confirmed that GSK3 $\beta$  is phosphorylated in EGF-  
409 treated cells and that this resulted in reduced levels of phosphorylation of Dyn1 at S774 (**Fig**

410 **10A**, quantified in **Fig 10B,C**). As predicted by the results of inhibitor experiments, EGF  
411 treatment of serum-starved cells also increased the rate of CCP initiation (**Fig 10D**), decreased  
412 CCP lifetimes (**Fig 10E**) and, compared to control cells, resulted in a shift of the lifetime  
413 distributions of bona fide CCPs to a more quasi-exponential distribution (**Fig 10F**). Importantly,  
414 the effects of EGF treatment on CCP initiation rate and lifetimes were not seen in A549 Dyn1<sup>KO</sup>  
415 cells (**Fig 10G,H**). These data suggest that Dyn1 can be activated to alter CCP dynamics under  
416 physiological conditions through signaling downstream of EGFR.

417

## 418 **Discussion:**

419

420 Our experiments provide further evidence that Dyn1, in addition to its well-studied roles  
421 in membrane fission during synaptic vesicle recycling, also has non-canonical functions as a  
422 regulator of the earliest stages of CME in non-neuronal cells. As in neurons, Dyn1 activity is  
423 negatively regulated by constitutive phosphorylation, and activated by dephosphorylation. When  
424 studied at endogenous levels of expression, we show that Dyn1 and Dyn2 have distinct  
425 functions in CME, reflected in their quantitatively and qualitatively different recruitment to CCPs.  
426 While Dyn1 is expressed at very high levels in the brain, it is, like Dyn2, also widely expressed  
427 albeit at lower levels in all tissues and cells [2]. Importantly, we show that acute activation of  
428 even low, nearly undetectable, levels of Dyn1 can increase the rates of CCP initiation and  
429 maturation to accelerate CME. These effects of Dyn1 activation are not accompanied by a burst  
430 of recruitment prior to CCP formation, and thus are likely mediated by unassembled Dyn1  
431 tetramers associated with CCPs.

432 As in neurons [33], Dyn1 is constitutively inactivated in non-neuronal cells by  
433 phosphorylation at S774 in the PRD by GSK3 $\beta$ . Acute chemical inhibition of GSK3 $\beta$  activates  
434 Dyn1 to alter CCP dynamics and increase the rate of CME. While GSK3 $\beta$  has numerous  
435 substrates, we show that Dyn1 is both necessary and sufficient to account for the effects of  
436 GSK3 $\beta$  inhibition on CCP dynamics and CME. Specifically, the effects of GSK3 $\beta$  inhibition on  
437 CME are dependent on Dyn1, but not Dyn2 expression, and Dyn1<sup>KO</sup> cells reconstituted with a  
438 nonphosphorylatable mutant of Dyn1 show increased rates of CCP initiation and maturation that  
439 phenocopy the effects of GSK3 $\beta$  inhibition.

440 When activated, either by GSK3 $\beta$  inhibition or by mutation of S774 and S778 to alanine,  
441 Dyn1 exhibits burst recruitment at late stages of CME and partially substitutes for Dyn2 activity.  
442 Yet, CME remains dependent on Dyn2, indicating that the two isoforms play functionally distinct  
443 roles in CME.

444 A direct comparison of the *in vitro* properties of Dyn1 and Dyn2 established that they  
445 differ in their curvature generating/sensing properties [14]. While Dyn1 is an efficient curvature  
446 generator that is able to tubulate and catalyze fission from planar lipid templates, Dyn2 is a  
447 curvature sensor that is able to catalyze membrane fission of highly curved lipid templates, but  
448 requires the synergistic activity of curvature-generating N-BAR domain-containing accessory  
449 factors to drive curvature generation and fission from planar templates [14, 15]. Strikingly, these  
450 biochemical differences could be ascribed to a single residue (Y600 in Dyn1, L600 in Dyn2)  
451 encoded within hydrophobic loops of the curvature-generating PH domain of dynamin [14].  
452 Based on these biochemical differences, it was suggested that the unique properties of Dyn2  
453 might enable this isoform to monitor CCP maturation and to catalyze fission only after the  
454 development of a narrow membrane neck connecting deeply invaginated CCPs to the plasma  
455 membrane. Unexpectedly, the findings presented here and elsewhere [23, 35, 39], establish  
456 that Dyn1 uniquely functions to regulate the earliest stages of CME, including the rate of CCP  
457 initiation and maturation.

458 Activation of Dyn1 also altered the shape of the lifetime distribution curve for CCPs from  
459 a broad Rayleigh-like distribution with a distinct peak at ~30s to a more exponential distribution.  
460 We have previously suggested that the Rayleigh-like shape reflects, rate-limiting regulatory  
461 processes operating during the first 30s of CCP progression [20, 22, 38]. It is possible that due  
462 to its curvature-generating ability, and/or through interactions with other partner proteins, Dyn1  
463 activation accelerates these complex early processes of CCP maturation.

464 Although Dyn1 and Dyn2 exhibit >80% sequence identity within their GTPase, middle,  
465 PH domains and GED, previous studies of the cellular activities Dyn1/Dyn2 chimeras have  
466 nonetheless revealed striking isoform-specific functional differences conferred by both the PH  
467 and GTPase domains [48, 49]. Most divergent among mammalian dynamin isoforms is the  
468 PRD, which functions to mediate interactions with numerous SH3 domain-containing binding  
469 partners, and has been shown to target dynamin to CCPs [40]. Earlier comparative studies of  
470 Dyn1 and Dyn2 [13], as well as Dyn1/Dyn2 PRD chimeras expressed at near endogenous  
471 levels [14], have shown that Dyn2 is more efficiently recruited to CCPs in a PRD-dependent  
472 manner. However, these studies did not take into account the negative regulation of Dyn1 by  
473 GSK3 $\beta$  phosphorylation. Here we reproduce and extend these findings by showing that the  
474 differential recruitment of Dyn1 is not due to phosphorylation of its PRD, at least on S774 or  
475 778. Indeed, the recruitment of Dyn1 to CCPs was not significantly enhanced by GSK3 $\beta$   
476 phosphorylation or when S774/S778 were mutated to nonphosphorylatable alanines. Thus,  
477 surprisingly, the effects of activated Dyn1 on CCP dynamics appear to occur independent of

478 detectably enhanced recruitment to CCPs. It will be important to identify isoform-specific binding  
479 partners for Dyn1 and Dyn2 in non-neuronal cells.

480 To date, most dynamin binding partners, including endophilin, amphiphysin, and  
481 intersectin have been identified in brain lysates in which Dyn1 is highly expressed and may play  
482 a specialized function in rapid synaptic vesicle recycling. Thus, it is perhaps not surprising that  
483 siRNA knockdown of these dynamin binding partners in non-neuronal cells has only mild effects  
484 on, primarily, Dyn2-dependent TfnR endocytosis. Further studies are needed to identify  
485 essential non-neuronal effectors of both Dyn2 and Dyn1 function in CME.

486 Unexpectedly, our data suggests that SNX9, which was first identified as a major binding  
487 partner of Dyn2 in HeLa cells [45], interacts most strongly with dephosphorylated Dyn1, and that  
488 the effects of Dyn1 activation on early CCP maturation are dependent on SNX9. Published  
489 findings on SNX9 function in CME are enigmatic. Consistent with our findings in A549 NSCLC  
490 cells, siRNA-mediated knockdown of SNX9 has only mild effects on CME in several cell lines  
491 studied [46, 50]. While it has been suggested that these mild effects are due to redundant  
492 functions of the distantly related (40% sequence identity) SNX18 [51], this is not the case in all  
493 cell types [50, 51]. TIRFM studies on the recruitment of overexpressed SNX9-GFP to CCPs  
494 have also yielded differing results: it has been reported to be recruited coincident with [46], after  
495 [31] and before dynamin [51]. Interestingly, one study reported that SNX9 might linger at  
496 endocytic 'hot-spots' where it could function as an organizer of CCP nucleation [52]. Our results  
497 further suggest a more complex role for SNX9 at multiple stages of CME. SNX9 is not required  
498 for activated Dyn1-dependent increases in the rates of CCP initiation. However, it is required for  
499 the effects of Dyn1 activation on accelerating CCP maturation as indicated by the marked  
500 switch from Rayleigh-like to quasi-exponential CCP lifetime distributions, which is reversed by  
501 SNX9 knockdown. That SNX9 knockdown alone decreases the rate of CCP initiation and slows  
502 CCP maturation in cells expressing Dyn1<sup>WT</sup>, suggests other, potentially Dyn2-dependent and/or  
503 independent functions in CME. More work is required to define both the multiple functions of  
504 SNX9 in CME and to identify Dyn1-specific binding partners required for CCP initiation.

505 Recent studies have shown that Dyn1 is upregulated and/or activated in several cancer  
506 cell lines [35, 39], leading to the suggestion that Dyn1 might function as a nexus between  
507 signaling and CME [2]. Here we show that Dyn1 can be activated downstream of EGFR to alter  
508 CCP dynamics. Previous studies showed that TRAIL-activated death receptors can activate  
509 Dyn1 to drive their selective uptake via CME [35]. Similarly, elegant studies on clathrin-mediated  
510 endocytosis of the G-protein coupled  $\beta$ -adrenergic receptors have shown that they alter the  
511 maturation kinetics of the CCPs in which they reside through delayed recruitment of Dyn2 [53].



512 These authors did not examine Dyn1 recruitment or function. Further studies will be needed to  
513 determine whether other signaling receptors can selectively alter the composition and/or  
514 maturation kinetics of CCPs in which they reside and, if so, whether these changes, as  
515 suggested by our present data, are at least in part Dyn1-dependent.

516 Based on our results and other recent findings [23, 35, 39] regarding Dyn1 function  
517 downstream of signaling in non-neuronal cells, it is surprising that Dyn1 knockout mice develop  
518 normally, can live for up to 2 weeks after birth, and exhibit primarily neuronal defects [12]. This  
519 could, in part be due to the redundant function of dynamin-3, as Dyn1/Dyn3-null mice exhibit a  
520 more severe phenotype and die within hours of birth [11]. However, we speculate that kinase-  
521 based activation of Dyn1 might function at the level of individual CCPs to foster their initiation  
522 and accelerate maturation, perhaps at a threshold of signaling not reached during normal  
523 development. Indeed, recent evidence has pointed to cargo-selective roles of Dyn1 in regulating  
524 CME and signaling in cancer cells [2, 35, 39]. Therefore, it might be interesting to probe Dyn1 or  
525 Dyn1/Dyn3 knockout mice for other, potentially more subtle, non-neuronal phenotypes related to  
526 signaling in health and disease.

527

## 528 **Materials and Methods**

529

### 530 **Cell culture, vector preparation, transfection and culture perturbations**

531 Non-small cell lung cancer cell lines A549 and H1299 were kindly provided by Dr. John  
532 Minna (The Hamon Center for Therapeutic Oncology, Depts. of Internal Medicine and  
533 Pharmacology, UTSW) and were grown in RPMI 1640 (Life Technologies) with 5% FBS at 37°C  
534 and 5% CO<sub>2</sub> and imaged in a temperature controlled chamber mimicking similar culture  
535 conditions.

536 The retroviral expression vector pMIEG was a modified pMIB (CMV-IRES-BFP) vector  
537 encoding Dyn1 cDNA with N-terminal HA-tag and C-terminal eGFP fusion tag. Point mutations  
538 to introduce S774/8A in Dyn1 cDNA were performed by site-directed mutagenesis. The lentiviral  
539 expression vector pLVX-puro (Clontech) encoded clathrin light chain A (CLCa) N-terminally  
540 tagged with mRuby 2 [54] or SNAP-tag [55] spaced with a 6 amino acid GGSGGS linker. The  
541 constructs were assembled from PCR fragments of mRuby2, SNAP and CLCa (for primers see  
542 Table 1) in yeast as described below and subsequently cloned into pLVX-puro. Lentiviruses  
543 were generated in 293T cells following standard transfection protocols [56] and were used for  
544 subsequent infections. They were prepared to transduce fluorescently tagged (mRuby2 or  
545 SNAP tag) CLCa fused to its N-terminus. Infected cells were selected using 10µg/ml puromycin

546 for 4 days, conditions under which uninfected cells perished. The cells were passaged for 2  
547 weeks before imaging for CME analysis. Retroviruses were also generated in 293T cells and  
548 used to stably transduce eGFP tagged Dyn1<sup>WT</sup>, Dyn1<sup>S774/8A</sup> and Dyn2<sup>WT</sup> proteins. Gene  
549 transduction was performed by exposing A549 or H1299 cells to retrovirus-containing cell  
550 culture supernatants. After 2 rounds of infection transduction with viral containing media, the  
551 recipient cells were expanded and FACS sorted for eGFP levels comparable to endogenous  
552 Dyn1-eGFP in A549 cells.

553 Transfections for siRNA knockdown experiments were carried out using Lipofectamine  
554 2000 or Lipofectamin RNAi-Max (Life Technologies), following manufacturer's protocol. For  
555 siRNA mediated knockdown, approximately  $2 \times 10^5$  cells (H1299) or  $3 \times 10^5$  cells (A549) were  
556 plated in each well of a six well plate. 20 nmol siRNA was used per well and two rounds of  
557 transfection across 5 days was sufficient to achieve over 90% knockdown.

558 Perturbation of culture conditions by GSK3 $\beta$  inhibitor involved addition of 10  $\mu$ M  
559 CHIR99021 (Sigma) to pre-warmed culture media and incubation of cells for 30 min before  
560 additional analysis. Growth factor stimulation was performed by adding 20 ng/ml EGF  
561 (Invitrogen) to pre-warmed, serum-free culture media. Cells were analyzed after 10 min of  
562 incubation with EGF.

563

#### 564 **Generation of genome-edited cell lines.**

565 Genome edited A549 and H1299 cells were generated by editing Dyn1 and Dyn2 to  
566 carry fusion tags. For the endogenous labeling of Dyn1 and Dyn2 with fluorescent reporter  
567 proteins, we chose an approach based on site directed introduction of CRISPR/CAS9n targeted  
568 DNA breaks and template assisted homology driven repair. eGFP fused to Dyn1 at its C-  
569 terminus was generated by CRISPR/Cas9n nickase strategy targeting the end of exon 21 of the  
570 DNM1 gene, inserting the last 19 amino acids of splice isoform "a", a seven amino acid linker  
571 [32], monomeric eGFP with a stop codon and the SV40 polyadenylation signal. In the donor  
572 plasmid, this inserted sequence was flanked by ~950 base pair homology arms for homology  
573 driven repair (HDR). The + gRNA pair was designed using publicly available software  
574 (<http://crispr.mit.edu/>) and prepared as described [57] with oligos DNM1-Nuclease-A-f/ DNM1-  
575 Nuclease-A-r and DNM1-Nuclease-B-f/ DNM1-Nuclease-B-r, respectively (Supplemental Table  
576 1). For assembly of the donor vector, the segments were amplified with oligonucleotides coding  
577 approximately 30 nucleotide overhangs. The bacterial artificial chromosome clone RP11-  
578 348G11 (BACPAC Resources Center, Children's Hospital Oakland Research Institute, Oakland,  
579 CA) covering the end of human DNM1 gene was used as template for the left and right

580 homology arms (**Fig 1A**). The left and right homology arms were amplified using primer pairs  
581 DNM1-LH-f/DNM1-LH-r and DNM1-RH-f/DNM1-RH-r, respectively (see Supplementary Table  
582 1). The 19 C-terminal amino acids of splice isoform “a” and the linker sequence DPPVATL [32]  
583 were covered with oligonucleotides DNM1-C-assembly-f and DNM1-C-assembly-r and amplified  
584 with short primers DNM1-Cterm-f and DNM1-Cterm-r. The sequence coding for monomeric  
585 eGFP and the SV40 polyadenylation signal were amplified from plasmid peGFP-N1 (Clontech),  
586 which carried the A206K mutation [58] with primers DNM1-eGFP-f/DNM1-eGFP-r and DNM1-  
587 pA-f/DNM1-pA-r, respectively. The first and last primers (DNM1-LH-f, DNM1-RH-r) also included  
588 overhangs for the E coli/yeast shuttle vector pRS424 [59]. For the DNM2-mRuby2 donor vector,  
589 the homology arms were amplified from the published [34] DNM2-eGFP construct (gift from D.  
590 Drubin, University of California, Berkeley) with primers DNM2-LH-f/ DNM2-LH-r and DNM2-RH-  
591 f/DNM2-RH-r, respectively. The mRuby2 segment together with the linker sequence, DPPVATL  
592 [32]}, was amplified from pmRuby2-C1 (Addgene #40260) [54]. The PCR products were purified  
593 on 1% agarose gels and extracted using standard protocols before transformation into YPH500  
594 yeast cells [60]. Yeast transformation, plasmid extraction and plasmid validation were performed  
595 as described earlier [61]. The guide-RNA plasmids for DNM1-eGFP and donor vectors for both  
596 DNM1-eGFP and DNM2-mRuby2 are currently being made available from Addgene (Accession  
597 IDs not yet available).

598 For both the edits, the nCas9 nickase + gRNA pairs or the ZFN nuclease pairs were  
599 added at 1 µg DNA concentration and 2 µg of the donor plasmid was added to this mixture in  
600 150 µl OptiMEM (Life Technologies). This mixture was then added to 5.5 µl of Lipofectamine  
601 2000 (Life Technologies) in 150 µl OptiMEM (Life Technologies), briefly vortexed and incubated  
602 at room temperature for 15 min. The mixture was then added to cells plated 12 h earlier at 70%  
603 confluency (~3x10<sup>6</sup> cells/well in 6 well dish) with freshly replaced media. Transfect containing  
604 media was replaced by pre-warmed fresh media and the cells were allowed to grow for the next  
605 48 h and then passaged for expansion in a 10 cm dish. The expanded cells were sorted as  
606 eGFP (or mRuby2) gene-edited single cells into 96 well plates, 4 days after transfection using a  
607 FACS Aria 2-SORP (BD Biosciences, San Jose, CA) instrument equipped with a 300-mW, 488-  
608 nm laser and a 100-µm nozzle. Clonal expansion ensued by incrementing the culture dish area  
609 and maintaining a minimum 50% cell confluency. Single clones were then assayed for edits by  
610 western blotting and cells positive for genome edits were expanded. In order to generate double  
611 genome edited A549 cells, The A549 clone, 2C8, with homozygous Dyn2-mRuby2 knock-in was  
612 chosen and subsequently edited for Dyn1 and cell selection was performed as before using  
613 FACS preliminary screen followed by western blotting for validation.

614 Dyn1 KO H1299 cells were generated as previously described [23] and the same  
615 strategy was employed to generate A549 Dyn1 KO cells. Briefly, cells plated in 6 well were  
616 transfected with 1 µg each of sgRNAs and Cas9 nickase encoding plasmids and co-transfected  
617 with a 20<sup>th</sup> of peGFP plasmid. eGFP positive cells were assumed to have harbored both the  
618 sgRNA guides and single cell sorted by FACS. In addition, Dyn2 KO cells were generated using  
619 a similar double nickase strategy with single-guide RNAs (sgRNAs)  
620 CGATCTGCGGCAGGTCCAGGTGG and CGCCGGCAAGAGCTCGGTGCTGG in the pX335  
621 vector. Complete knockout of Dyn1 and 2 was validated by western blotting.

622

### 623 **Immunoprecipitation, pulldowns and subcellular fractionation**

624 *GST-SH3 pulldown.* GST-Amph II SH3 pulldown involved lysing H1299 cells in lysis  
625 buffer (50mM Tris, 150mM NaCl, 1X Protease Inhibitor Cocktail (Roche)) containing 0.2% Triton  
626 X-100. Cells were dounced with 27.5 G syringe for about 20 times or until most of the cells were  
627 ruptured to release intact nuclei. The post-nuclear fraction (PNF) was obtained by spinning the  
628 lysate at 10,000 x g at 4°C for 10 min and collecting the supernatant. About 3 mg of PNF in 1ml  
629 volume was used for each pulldown. Addition of beads (~20 µl) with bait protein (GST-Amph II  
630 SH3) in PNF followed by gentle rotation for 1 hr allowed binding of target proteins. The bound  
631 fraction was washed twice with lysis buffer containing 0.2% Triton-X-100 and the resulting  
632 beads were denatured using 2X Laemmli buffer (Bio-Rad), reduced with 5% β-mercaptethanol,  
633 boiled and run on SDS-PAGE gel of appropriate separation capacity (7.5% or 12%, based on  
634 the target protein size). The pulldowns were analyzed by western blotting.

635 *Subcellular fractionation.* Confluent A549 cells in a 60 mm dish were detached with 1 ml  
636 10 mM EDTA at 37 °C for 10 min and washed with PBS by centrifugation, and then  
637 resuspended in 0.5 ml buffer 2 (25mM HEPES, 250mM sucrose, 1 mM MgCl<sub>2</sub>, 2mM EGTA, pH  
638 7.4). The resuspended cells were lysed through 3 cycles of freeze-thaw (rapid freezing in liquid  
639 nitrogen and slow thawing in room temperature water). Cytoplasm and membrane portions were  
640 separated by 30 min ultracentrifugation at 110kg in a Beckman Coulter rotor(TLA55). Pellets  
641 were resuspended with 0.5 ml buffer 2 and both supernatant and pellets were solubilized in  
642 0.5% Triton X-100 for 10 min on ice, and then precipitated with 10% TCA, followed by 2 rounds  
643 of 1 ml acetone wash. SDS-PAGE gel electrophoresis and Western blot were applied as  
644 described above [62].

645 *GFP-nAb Immunoprecipitation.* Confluent A549 cells in a 10 cm dish were detached with  
646 2 ml 10 mM EDTA at 37 °C for 10 min and washed with PBS by centrifugation, and then  
647 resuspended and gently lysed for 15 min on ice with 2 ml buffer 3 (0.5% Triton X-100, 25mM

648 HEPES, 150mM KCl, 1 mM MgCl<sub>2</sub>, 2 mM EGTA, 1X Protease Inhibitor Cocktail (Roche), 1X  
649 Phosphatase Inhibitor Cocktail, pH = 7.4). Lysates were centrifuged at 5000xg, 4 °C for 5 min  
650 to remove nuclei, and protein concentration in the post-nuclear fraction (PNF) was determined  
651 by Bradford assay. 0.5 mg of the PNF was added to 30 µl GFP-nAb agarose (Allele Biotech),  
652 rotated for 2 hours at 4 °C and then spun down at 2500xg, 4 °C, 2 min. The agarose was  
653 washed twice (1ml/each) with two different buffers to fulfill different experimental purposes: 1) to  
654 probe the dynamin interactors, the agarose was washed with buffer 3; 2) to probe dynamin self-  
655 assembly, salt concentration in buffer 3 was brought up to 300 mM to remove indirect dynamin-  
656 dynamin interactions. 10% cell lysate, which is used to determine immunoprecipitation  
657 efficiency, was precipitated with 10% TCA and washed twice with acetone from -20 °C freezer.  
658 The samples were applied to SDS page gel and Western blot for analysis.

659

### 660 **Total internal reflection fluorescence microscopy (TIRFM)**

661 Cells expressing appropriate fluorophores were cultured overnight on an acid-etched  
662 and gelatin coated coverslip, placed in a well in 6 well plate. At the time of imaging, cells were  
663 checked for adherence and spreading. When imaging SNAP-tagged proteins, labeling was  
664 performed by incubating cells in 1 ml of fresh, pre-warmed media containing 1µl of pre-dissolved  
665 SNAP-CELL 647-SiR dye (NEB). After 30 min incubation under standard incubator conditions,  
666 the media was aspirated, washed twice with sterile PBS and re-incubated in fresh culture  
667 media. The coverslips were mounted on glass slides with spacers and sealed with the same  
668 media. In the event of adding growth factor or inhibitor, cells were pre-incubated for appropriate  
669 time and the coverslips were mounted as before with the treated media. The coverslips were  
670 then imaged using a 60x 1.49 NA Apo TIRF objective (Nikon) mounted on a Ti-Eclipse inverted  
671 microscope with Perfect Focus System (Nikon) equipped with an additional 1.8x tube lens,  
672 yielding at a total magnification of 108x. TIRFM illumination was achieved using a Discovery  
673 Platform (Andor Technology). During imaging, cells were maintained at 37°C in RPMI  
674 supplemented with 5% fetal calf serum. Time-lapse image sequences were acquired at a  
675 penetration depth of 80 nm and a frame rate of 2Hz (three or two channels) or 1Hz (single  
676 channel) using a sCMOS camera with 6.5mm pixel size (pco.edge).

677

### 678 **Quantitative analysis of Imaging**

679 The detection, tracking and analysis of all clathrin-labeled structures and thresholding to  
680 identify bona fide CCPs was done as previously described using the cmeAnalysis software  
681 package [22]. Briefly, diffraction-limited clathrin structures were detected using a Gaussian-

682 based model method to approximate the point-spread function [22], and trajectories were  
683 determined from clathrin structure detections using the u-track software [37]. Subthreshold  
684 CLSs (sCLCs) were distinguished from bona fide CCPs as previously described, based on the  
685 quantitative and unbiased analysis of clathrin intensity progression in the early stages of  
686 structure formation [22, 63]. Both sCLCs and CCPs represent nucleation events, but only bona  
687 fide CCPs represent structures that undergo stabilization, maturation and in some cases  
688 scission to produce intracellular vesicles [22, 63]). We report the rate of bona fide CCP  
689 formation, distribution of CCP lifetimes as well as intensity cohorts as described previously [22].  
690 We also report mean and maximum signal intensities in two or three channels for each  
691 individual CCP. These are average and maximum signal intensities for individual CCPs as they  
692 are extracted by the previously described analysis software [22]. The extraction of CCPs is  
693 achieved by a new function added to the cmeAnalysis software published in [22] that allows us  
694 to link the classification of events, CCPs or CLSs, to more sophisticated analysis intensity time  
695 courses and lifetime. In this study we focused merely on per-CCP mean and maximum intensity  
696 values, which were averaged per movie (1-5 cells) and finally presented as per-movie  
697 distributions covering 10-30 cells per experimental condition. Differences between conditions  
698 were assessed by comparison of the normal-distributed per-movie distributions using Student's  
699 t-test and a threshold of  $p < 0.01$  to mark statistical significance.

700

## 701 **Statistical Analysis**

702 Control and treatment datasets were statistically analyzed with two-tailed unpaired  
703 Student's t-tests using Graphpad Prism 5.0 (Graphpad Software, La Jolla, CA), from which  $p$   
704 values were derived (\*  $p < 0.05$ , \*\*  $p < 0.01$ , \*\*\*  $p < 0.001$ , \*\*\*\*  $p < 0.0001$ ). Error bars  
705 representing standard error of the mean (sem) for at least three independent experiments were  
706 calculated using Microsoft Excel.

707

## 708 **Receptor internalization (endocytosis) assay**

709 An in-Cell ELISA approach was used to quantitate internalization of transferrin receptor  
710 (TfnR) and EGFR, as previously described [23], using either anti-TfnR mAb (HTR-D65) [64] or  
711 biotinylated-EGF as ligands. Cells were grown overnight in 96-well plates at a density of  $2 \times 10^5$   
712 cells/well and incubated with 4 mg/ml of D65 or 20 ng/ml of biotinylated-EGF (Invitrogen) in  
713 assay buffer (PBS4+: PBS supplemented with 1 mM  $MgCl_2$ , 1 mM  $CaCl_2$ , 5 mM glucose and  
714 0.2% bovine serum albumin) at 37°C for the indicated time points. Cells were then immediately  
715 cooled down (4°C) to arrest internalization. The remaining surface-bound D65 or biotinylated-

716 EGF was removed from the cells by an acid wash step (0.2 M acetic acid, 0.2 M NaCl, pH 2.5).  
717 Cells were then washed with cold PBS and then fixed in 4% paraformaldehyde (PFA) (Electron  
718 Microscopy Sciences) in PBS for 30 min and subsequently permeabilized with 0.1% Triton X-  
719 100/PBS for 10 min. Internalized D65 was assessed using a goat anti-mouse HRP-conjugated  
720 antibody (Life Technologies), and internalized biotinylated-EGF was assessed by streptavidin-  
721 POD (Roche). The reaction was developed by a colorimetric approach with OPD (Sigma-  
722 Aldrich), and additional color development was stopped by addition of 50  $\mu$ l of 5M of H<sub>2</sub>SO<sub>4</sub>. The  
723 absorbance was read at 490 nm (Biotek Synergy H1 Hybrid Reader). Internalized ligand was  
724 expressed as the percentage of the total surface-bound ligand at 4°C (i.e., without acid wash  
725 step), measured in parallel [23]. Well-to-well variability in cell number was accounted for by  
726 normalizing the reading at 490 nm with BCA readout at 560 nm.

727

## 728 **Acknowledgments:**

729

730 We thank members of the Schmid lab for helpful discussions and critically reading the  
731 manuscript, Phillipe Roudot for help with data analysis, Marcel Mettlen for help with microscopy,  
732 Carlos Reis generated the Dyn2<sup>KO</sup> A549 cells and David Drubin generously provided the Zinc-  
733 finger nuclease constructs. These studies were supported by NIH R01 grants GM073165 to  
734 SLS and GD, GM42455 and MH61345 to SLS and Welch Foundation Grant I-1823 to SLS.

735

## 736 **References**

- 737 1. Mettlen M, Chen P-H, Srinivasan S, Danuser G, Schmid SL. Regulation of Clathrin-mediated  
738 Endocytosis. *Ann Rev Biochem* 2018;in press.
- 739 2. Schmid SL. Reciprocal regulation of signaling and endocytosis: Implications for the evolving  
740 cancer cell. *J Cell Biol*. 2017;216:2623-32.
- 741 3. Wideman JG, Leung KF, Field MC, Dacks JB. The cell biology of the endocytic system from  
742 an evolutionary perspective. *Cold Spring Harb Perspect Biol*. 2014;6:a016998.
- 743 4. Dergai M, Iershov A, Novokhatska O, Pankivskyi S, Rynditch A. Evolutionary Changes on  
744 the Way to Clathrin-Mediated Endocytosis in Animals. *Genome Biology and Evolution*.  
745 2016;8:588-606.
- 746 5. Liu Y-W, Su AI, Schmid SL. The evolution of dynamin to regulate clathrin-mediated  
747 endocytosis Speculations on the evolutionarily late appearance of dynamin relative to  
748 clathrin-mediated endocytosis. *Bioessays*. 2012;34:643-7.
- 749 6. Schmid SL, Frolov VA. Dynamin: Functional design of a membrane fission catalyst. *Ann Rev*  
750 *Cell Dev Biol*. 2011;27:79-105.
- 751 7. Ferguson SM, De Camilli P. Dynamin, a membrane-remodelling GTPase. *Nature Reviews*  
752 *Mol. Cell Biol*. 2012;13:75-88.
- 753 8. Morlot S, Roux A. Mechanics of Dynamin-Mediated Membrane Fission. *Ann Rev Biophysics*.  
754 2013;42:629-49.

- 755 9. Cao H, Garcia F, McNiven MA. Differential distribution of dynamin isoforms in mammalian  
756 cells. *Mol. Biol. Cell.* 1998;9:2595-609.
- 757 10. Antonny B, Burd C, De Camilli P, Chen E, Daumke O, Faelber K, et al. Membrane fission by  
758 dynamin: what we know and what we need to know. *EMBO J.* 2016;35:2270-84.
- 759 11. Raimondi A, Ferguson SM, Lou X, Armbruster M, Paradise S, Giovedi S, et al. Overlapping  
760 role of dynamin isoforms in synaptic vesicle endocytosis. *Neuron.* 2011;70:1100-14.
- 761 12. Ferguson SM, Brasnjo G, Hayashi M, Wolfel M, Collesi C, Giovedi S, et al. A selective  
762 activity-dependent requirement for dynamin 1 in synaptic vesicle endocytosis. *Science.*  
763 2007;316:570-4.
- 764 13. Liu YW, Surka MC, Schroeter T, Lukiyanchuk V, Schmid SL. Isoform and splice-variant  
765 specific functions of dynamin-2 revealed by analysis of conditional knock-out cells. *Mol Biol*  
766 *Cell.* 2008;19:5347-59.
- 767 14. Liu Y-W, Neumann S, Ramachandran R, Ferguson SM, Pucadyil TJ, Schmid SL. Differential  
768 curvature sensing and generating activities of dynamin isoforms provide opportunities for  
769 tissue-specific regulation. *Proc. Natl. Acad. Sci. (USA)* 2011;108:E234-E42.
- 770 15. Neumann S, Schmid SL. Dual role of BAR domain-containing proteins in regulating vesicle  
771 release catalyzed by the GTPase, dynamin-2. *J Biol Chem.* 2013;288:25119-28.
- 772 16. Praefcke GJK, McMahon HT. The dynamin superfamily: Universal membrane tubulation and  
773 fission molecules? *Nature Reviews Molecular Cell Biology.* 2004;5:133-47.
- 774 17. Grassart A, Cheng AT, Hong SH, Zhang F, Zenzer N, Feng YM, et al. Actin and dynamin2  
775 dynamics and interplay during clathrin-mediated endocytosis. *J Cell Biol.* 2014;205:721-35.
- 776 18. Hong SH, Cortesio CL, Drubin DG. Machine-Learning-Based Analysis in Genome-Edited  
777 Cells Reveals the Efficiency of Clathrin-Mediated Endocytosis. *Cell Rep.* 2015;12:2121-30.
- 778 19. Sever S, Muhlberg AB, Schmid SL. Impairment of dynamin's GAP domain stimulates  
779 receptor-mediated endocytosis. *Nature.* 1999;398:481-6.
- 780 20. Loerke D, Mettlen M, Yarar D, Jaqaman K, Jaqaman H, Danuser G, et al. Cargo and  
781 dynamin regulate clathrin-coated pit maturation. *PLoS Biol.* 2009;7:e57.
- 782 21. Taylor MJ, Lampe M, Merrifield CJ. A feedback loop between dynamin and actin recruitment  
783 during clathrin-mediated endocytosis. *PLoS Biol.* 2012;10:e1001302.
- 784 22. Aguet F, Antonescu CN, Mettlen M, Schmid SL, Danuser G. Advances in analysis of low  
785 signal-to-noise images link dynamin and AP2 to the functions of an endocytic checkpoint.  
786 *Dev Cell.* 2013;26:279-91.
- 787 23. Reis CR, Chen PH, Srinivasan S, Aguet F, Mettlen M, Schmid SL. Crosstalk between  
788 Akt/GSK3beta signaling and dynamin-1 regulates clathrin-mediated endocytosis. *EMBO J.*  
789 2015;34:2132-46.
- 790 24. Anggono V, Smillie KJ, Graham ME, Valova VA, Cousin MA, Robinson PJ. Syndapin I is the  
791 phosphorylation-regulated dynamin I partner in synaptic vesicle endocytosis. *Nat Neurosci.*  
792 2006;9:752-60.
- 793 25. Huang Y, Chen-Hwang MC, Dolios G, Murakami N, Padovan JC, Wang R, et al.  
794 Mnb/Dyrk1A phosphorylation regulates the interaction of dynamin 1 with SH3 domain-  
795 containing proteins. *Biochemistry.* 2004;43:10173-85.
- 796 26. Damke H, Baba T, Warnock DE, Schmid SL. Induction of mutant dynamin specifically blocks  
797 endocytic coated vesicle formation. *J Cell Biol.* 1994;127:915-34.
- 798 27. Warnock DE, Baba T, Schmid SL. Ubiquitously expressed dynamin-II has a higher intrinsic  
799 GTPase activity and a greater propensity for self-assembly than neuronal dynamin-I. *Mol*  
800 *Biol Cell.* 1997;8:2553-62.
- 801 28. Merrifield CJ, Feldman ME, Wan L, Almers W. Imaging actin and dynamin recruitment  
802 during invagination of single clathrin-coated pits. *Nat Cell Biol.* 2002;4:691-8.
- 803 29. Ehrlich M, Boll W, Van Oijen A, Hariharan R, Chandran K, Nibert ML, et al. Endocytosis by  
804 random initiation and stabilization of clathrin-coated pits. *Cell.* 2004;118:591-605.



- 805 30. Rappoport JZ, Heyman KP, Kemal S, Simon SM. Dynamics of dynamin during clathrin  
806 mediated endocytosis in PC12 cells. *PLoS One*. 2008;3:e2416.
- 807 31. Taylor MJ, Perrais D, Merrifield CJ. A high precision survey of the molecular dynamics of  
808 mammalian clathrin-mediated endocytosis. *PLoS Biol*. 2011;9:e1000604.
- 809 32. Cocucci E, Gaudin R, Kirchhausen T. Dynamin recruitment and membrane scission at the  
810 neck of a clathrin-coated pit. *Mol Biol Cell*. 2014;25:3595-609.
- 811 33. Clayton EL, Sue N, Smillie KJ, O'Leary T, Bache N, Cheung G, et al. Dynamin I  
812 phosphorylation by GSK3 controls activity-dependent bulk endocytosis of synaptic vesicles.  
813 *Nat Neurosci*. 2010;13:845-51.
- 814 34. Doyon JB, Zeitler B, Cheng J, Cheng AT, Cherone JM, Santiago Y, et al. Rapid and efficient  
815 clathrin-mediated endocytosis revealed in genome-edited mammalian cells. *Nat Cell Biol*.  
816 2011;13:331-7.
- 817 35. Reis CR, Chen PH, Bendris N, Schmid SL. TRAIL-death receptor endocytosis and apoptosis  
818 are selectively regulated by dynamin-1 activation. *Proc Natl Acad Sci (USA)*. 2017;114:504-  
819 9.
- 820 36. Gaidarov I, Santini F, Warren RA, Keen JH. Spatial control of coated pit dynamics in living  
821 cells. *Nature Cell Biol*. 1999;1:1-7.
- 822 37. Jaqaman K, Loerke D, Mettlen M, Kuwata H, Grinstein S, Schmid SL, et al. Robust single-  
823 particle tracking in live-cell time-lapse sequences. *Nat Methods*. 2008;5:695-702.
- 824 38. Loerke D, Mettlen M, Schmid SL, Danuser G. Measuring the hierarchy of molecular events  
825 during clathrin-mediated endocytosis. *Traffic*. 2011;12:815-25.
- 826 39. Chen PH, Bendris N, Hsiao YJ, Reis CR, Mettlen M, Chen HY, et al. Crosstalk between  
827 CLCb/Dyn1-Mediated Adaptive Clathrin-Mediated Endocytosis and Epidermal Growth  
828 Factor Receptor Signaling Increases Metastasis. *Dev Cell*. 2017;40:278-88 e5.
- 829 40. Shpetner HS, Herskovits JS, Vallee RB. A binding site for SH3 domains targets dynamin to  
830 coated pits. *J Biol Chem*. 1996;271:13-6.
- 831 41. Ramachandran R, Surka M, Chappie JS, Fowler DM, Foss TR, Song BD, et al. The dynamin  
832 middle domain is critical for tetramerization and higher-order self-assembly. *EMBO J*.  
833 2007;26:559-66.
- 834 42. Reubold TF, Faelber K, Plattner N, Posor Y, Ketel K, Curth U, et al. Crystal structure of the  
835 dynamin tetramer. *Nature*. 2015;525:404-8.
- 836 43. Liu YW, Mattila JP, Schmid SL. Dynamin-catalyzed membrane fission requires coordinated  
837 GTP hydrolysis. *PLoS One*. 2013;8:e55691.
- 838 44. Warnock DE, Hinshaw JE, Schmid SL. Dynamin self-assembly stimulates its GTPase  
839 activity. *J Biol Chem*. 1996;271:22310-4.
- 840 45. Lundmark R, Carlsson SR. Sorting nexin 9 participates in clathrin-mediated endocytosis  
841 through interactions with the core components. *J Biol Chem*. 2003;278:46772-81.
- 842 46. Soulet F, Yarar D, Leonard M, Schmid SL. SNX9 regulates dynamin assembly and is  
843 required for efficient clathrin-mediated endocytosis. *Mol Biol Cell*. 2005;16:2058-67.
- 844 47. Manning BD, Toker A. AKT/PKB Signaling: Navigating the Network. *Cell*. 2017;169:381-405.
- 845 48. Liu YW, Neumann S, Ramachandran R, Ferguson SM, Pucadyil TJ, Schmid SL. Differential  
846 curvature sensing and generating activities of dynamin isoforms provide opportunities for  
847 tissue-specific regulation. *Proc Natl Acad Sci (USA)*. 2011;108:E234-42.
- 848 49. Soulet F, Schmid SL, Damke H. Domain requirements for an endocytosis-independent,  
849 isoform-specific function of dynamin-2. *Exp Cell Res*. 2006;312:3539-45.
- 850 50. Bendris N, Williams KC, Reis CR, Welf ES, Chen PH, Lemmers B, et al. SNX9 promotes  
851 metastasis by enhancing cancer cell invasion via differential regulation of RhoGTPases. *Mol  
852 Biol Cell*. 2016.
- 853 51. Posor Y, Eichhorn-Gruenig M, Puchkov D, Schoneberg J, Ullrich A, Lampe A, et al.  
854 Spatiotemporal control of endocytosis by phosphatidylinositol-3,4-bisphosphate. *Nature*.  
855 2013;499:233-7.

- 856 52. Nunez D, Antonescu C, Mettlen M, Liu A, Schmid SL, Loerke D, et al. Hotspots organize  
857 clathrin-mediated endocytosis by efficient recruitment and retention of nucleating resources.  
858 *Traffic*. 2011;12:1868-78.
- 859 53. Puthenveedu MA, von Zastrow M. Cargo regulates clathrin-coated pit dynamics. *Cell*.  
860 2006;127:113-24.
- 861 54. Lam AJ, St-Pierre F, Gong Y, Marshall JD, Cranfill PJ, Baird MA, et al. Improving FRET  
862 dynamic range with bright green and red fluorescent proteins. *Nat Methods*. 2012;9:1005-  
863 12.
- 864 55. Keppler A, Gendreizig S, Gronemeyer T, Pick H, Vogel H, Johnsson K. A general method  
865 for the covalent labeling of fusion proteins with small molecules in vivo. *Nat Biotechnol*.  
866 2003;21:86-9.
- 867 56. Barde I, Salmon P, Trono D. Production and titration of lentiviral vectors. *Curr Protoc*  
868 *Neurosci*. 2010;Chapter 4:Unit 4 21.
- 869 57. Ran FA, Hsu PD, Wright J, Agarwala V, Scott DA, Zhang F. Genome engineering using the  
870 CRISPR-Cas9 system. *Nat Protoc*. 2013;8:2281-308.
- 871 58. Zacharias DA, Violin JD, Newton AC, Tsien RY. Partitioning of lipid-modified monomeric  
872 GFPs into membrane microdomains of live cells. *Science*. 2002;296:913-6.
- 873 59. Sikorski RS, Hieter P. A system of shuttle vectors and yeast host strains designed for  
874 efficient manipulation of DNA in *Saccharomyces cerevisiae*. *Genetics*. 1989;122:19-27.
- 875 60. Cermak T, Doyle EL, Christian M, Wang L, Zhang Y, Schmidt C, et al. Efficient design and  
876 assembly of custom TALEN and other TAL effector-based constructs for DNA targeting.  
877 *Nucleic Acids Res*. 2011;39:e82.
- 878 61. Gan Z, Ding L, Burckhardt CJ, Lowery J, Zaritsky A, Sitterley K, et al. Vimentin Intermediate  
879 Filaments Template Microtubule Networks to Enhance Persistence in Cell Polarity and  
880 Directed Migration. *Cell Syst*. 2016;3:252-63 e8.
- 881 62. van der Bliek AM, Redelmeier TE, Damke H, Tisdale EJ, Meyerowitz EM, Schmid SL.  
882 Mutations in human dynamin block an intermediate stage in coated vesicle formation. *J Cell*  
883 *Biol*. 1993;122:553-63.
- 884 63. Kadlecova Z, Spielman SJ, Loerke D, Mohanakrishnan A, Reed DK, Schmid SL. Regulation  
885 of clathrin-mediated endocytosis by hierarchical allosteric activation of AP2. *J Cell Biol*.  
886 2017;216:167-79.
- 887 64. Schmid SL, Smythe E. Stage-specific assays for coated pit formation and coated vesicle  
888 budding in vitro. *J Cell Biol*. 1991;114:869-80.

889

890 **Supplementary table 1:** Oligonucleotides used for genome-editing, mutagenesis and fusion  
 891 constructs

| nr | name              | sequence                                                             |
|----|-------------------|----------------------------------------------------------------------|
| 1  | DNM1-LH-f         | GCGTAATACGACTCACTATAGGGCGAATTGGGTACCCACAGTCCCAGCAGG                  |
| 2  | DNM1-LH-r         | GCCTGACCCGATCGGCTGGGGACCCCGGGCGGGCGCGGTTG                            |
| 3  | DNM1-C-assembly-f | CCCGGGGTCCCCAGCCGATCGGGTCAGGCAAGTCCATCCCGTCTGAGAGCCC<br>CAGGCCCCCTTC |
| 4  | DNM1-C-assembly-r | CTCGCCCTTGCTCACTAAGGTCGCGACTGGGGATCGAGGTGAAGGGGGGCC<br>TGGGGCTCTCAG  |
| 5  | DNM1-Cterm-f      | CCCGGGGTCCCCAGCCGATCGGGTCAGGC                                        |
| 6  | DNM1-Cterm-r      | CTCGCCCTTGCTCACTAAGGTCGCGACTGGGGATCGAGGTGAAGGGGGGCC<br>TG            |
| 7  | DNM1-eGFP-f       | CCCCCTTCGACCTCGATCCCCAGTCGCGACCTTAGTGAGCAAGGGCGAG                    |
| 8  | DNM1-eGFP-r       | CTAGAGTCGCGGCCGCTTTACTTGTACAGCTC                                     |
| 9  | DNM1-pA-f         | GAGCTGTACAAGTAAAGCGGCCGCGACTCTAG                                     |
| 10 | DNM1-pA-r         | GGAACAAAAGCTGGAGCTCCACCGCGGTGGCGGCCGCCTGCTGTGTTCTTCC                 |
| 11 | DNM1-RH-f         | CATCAATGTATCTTAGCTGAATGCGGCTGG                                       |
| 12 | DNM1-RH-r         | GGAACAAAAGCTGGAGCTCCACCGCGGTGGCGGCCGCCTGCTGTGTTCTTCC                 |
| 13 | DNM2-LH-f         | GCGCGCGTAATACGACTCACTATAGGGCGAATTGGGTACCGCCCCGCTCAGAT<br>TCCC        |
| 14 | DNM2-LH-r         | CTTCGCCCTTAGACACCAACGTCGCCACCGCGGGTTCGTCGAGCAGGGATGGC<br>TC          |
| 15 | DNM2-mRuby2-f     | GAGCCATCCCTGCTCGACGACCCGCCGGTGGCGACGTTGGTGTCTAAGGGCGA<br>AG          |
| 16 | DNM2-mRuby2-r     | CACGCCCCCTCGAGGCTTACCCTCCGCCAGGCCGGCGAAC                             |
| 17 | DNM2-RH-f         | GTTCGCCGCTGGGCGGAGGGTAAGCCTCGAGGGGGCGTG                              |
| 18 | DNM2-RH-r         | AAGGGAACAAAAGCTGGAGCTCCACCGCGGTGGCGGCCGCGGCCCTGGGC<br>CCAC           |
| 19 | DNM1-Nuclease-A-f | CACCGACCCCGGGCGGGCGCGGTT                                             |
| 20 | DNM1-Nuclease-A-r | AAACAACCGCGCCCCGCGGGGTC                                              |
| 21 | DNM1-Nuclease-B-f | CACCGGAGTAGGGCTGAATGCGGC                                             |
| 22 | DNM1-Nuclease-B-r | AAACGCCGATTCAGCCCCTACTCC                                             |
| 23 | DNM1-S774A_mut_f  | CCGGACGCAGGGCGCCACGTCC                                               |
| 24 | DNM1-S774A_mut_r  | GGACGTGGGCGCCCTGCGTCCGG                                              |
| 25 | DNM1-S778A_mut_f  | CGCCACGTCCGCCCCACGCCGC                                               |
| 26 | DNM1-S778A_mut_r  | GCGGCGTGGGGCGGACGTGGGCG                                              |
| 27 | SNAP-f            | AATACGACTCACTATAGGGCGAATTGGGTACCGAATTCTGCCACCATGGACAA<br>AGACTGC     |
| 28 | SNAP-r            | GATCCAGCTCAGCCATGCTGCCTCCTGAACCTCCACCCAGCCAGGCTTGC                   |
| 29 | SNAP-CLCa-f       | GCAAGCCTGGGCTGGGTGGAGGTTAGGAGGCAGCATGGCTGAGCTGGATC                   |
| 30 | CLCa-r            | GGGAACAAAAGCTGGAGCTCCACCGCGGTGGCGGCCGCTCGACTTAGTGAC<br>CAGCGG        |
| 31 | mRuby2-f          | AATACGACTCACTATAGGGCGAATTGGGTACCGAATTCTGCCACCATGGTGT<br>TAAGGGC      |
| 32 | mRuby2-r          | GATCCAGCTCAGCCATGCTGCCTCCTGAACCTCCCTTGTACAGCTCGTC                    |
| 33 | MRuby2-CLCa-f     | GACGAGCTGTACAAGGGAGGTTAGGAGGCAGCATGGCTGAGCTGGATC                     |

892 Primers used for the assembly of the donor vectors for DNM1-EGFP (nr1-12), DNM2-  
 893 mRuby2 (nr13-18), the nickase CRISPR/Cas9 guide RNA for DNM1 (nr19-22), DNM1 S774/8A  
 894 mutagenesis (nr23 & 24) and for generation of the SNAP-CLCa and mRuby2-CLCa vectors  
 895 (nr25-31). The donor DNA for DNM1-eGFP was assembled into the vector from five fragments:

896 i) left homology (LH) arm, ii) DNM1 C-terminal 19 amino acids together with a seven amino acid  
897 linker (C-assembly), iii) monomeric eGFP (GFP), iv) SV40 polyadenylation signal (pA) and v)  
898 the right homology arm (RH), which were amplified with forward (f) and reverse (r) primers, as  
899 indicated. Likewise, the donor DNA for DNM2-mRuby2 was assembled into the vector from  
900 three fragments: i) the left homology arm (LH), ii) mRuby2 and iii) the right homology arm (RH).  
901 Primers 19-20 were used to generate the guides A and B for the nickase CRISPR-CAS9 guide  
902 RNA targeting DNM1. Primers 25-31 were used to generate CLCa-SNAP tagged lentiviral  
903 vectors.

890 **Supplementary table 1:** Oligonucleotides used for genome-editing, mutagenesis and fusion  
891 constructs

| nr | name              | sequence                                                             |
|----|-------------------|----------------------------------------------------------------------|
| 1  | DNM1-LH-f         | GCGTAATACGACTCACTATAGGGCGAATTGGGTACCCACAGTCCCAGCAGG                  |
| 2  | DNM1-LH-r         | GCCTGACCCGATCGGCTGGGGACCCCGGGCGGGGCGCGTTG                            |
| 3  | DNM1-C-assembly-f | CCCGGGGTCCCCAGCCGATCGGGTCAGGCAAGTCCATCCCGTCTGAGAGCCC<br>CAGGCCCCCTTC |
| 4  | DNM1-C-assembly-r | CTCGCCCTTGCTCACTAAGGTCGCGACTGGGGATCGAGGTGAAGGGGGGCC<br>TGGGGCTCTCAG  |
| 5  | DNM1-Cterm-f      | CCCGGGGTCCCCAGCCGATCGGGTCAGGC                                        |
| 6  | DNM1-Cterm-r      | CTCGCCCTTGCTCACTAAGGTCGCGACTGGGGATCGAGGTGAAGGGGGGCC<br>TG            |
| 7  | DNM1-eGFP-f       | CCCCCTTCGACCTCGATCCCCAGTCGCGACCTTAGTGAGCAAGGGCGAG                    |
| 8  | DNM1-eGFP-r       | CTAGAGTCGCGGCCGCTTTACTTGTACAGCTC                                     |
| 9  | DNM1-pA-f         | GAGCTGTACAAGTAAAGCGGCCGCGACTCTAG                                     |
| 10 | DNM1-pA-r         | GGAACAAAAGCTGGAGCTCCACCGCGGTGGCGGCCGCCTGCTGTGTTCTTCC                 |
| 11 | DNM1-RH-f         | CATCAATGTATCTTAGCTGAATGCGGCTGG                                       |
| 12 | DNM1-RH-r         | GGAACAAAAGCTGGAGCTCCACCGCGGTGGCGGCCGCCTGCTGTGTTCTTCC                 |
| 13 | DNM2-LH-f         | GCGCGCGTAATACGACTCACTATAGGGCGAATTGGGTACCGCCCCGCTCAGAT<br>TCCC        |
| 14 | DNM2-LH-r         | CTTCGCCCTTAGACACCAACGTCGCCACCGCGGGTTCGTCGAGCAGGGATGGC<br>TC          |
| 15 | DNM2-mRuby2-f     | GAGCCATCCCTGCTCGACGACCCGCCGGTGGCGACGTTGGTGTCTAAGGGCGA<br>AG          |
| 16 | DNM2-mRuby2-r     | CACGCCCCCTCGAGGCTTACCCTCCGCCAGGCCGGCGAAC                             |
| 17 | DNM2-RH-f         | GTTCGCCGCTGGGCGGAGGGTAAGCCTCGAGGGGGCGTG                              |
| 18 | DNM2-RH-r         | AAGGGAACAAAAGCTGGAGCTCCACCGCGGTGGCGGCCGCGGCCCTGGGC<br>CCAC           |
| 19 | DNM1-Nuclease-A-f | CACCGACCCCGGGCGGGGCGCGGTT                                            |
| 20 | DNM1-Nuclease-A-r | AAACAACCGCGCCCCGCGGGGTC                                              |
| 21 | DNM1-Nuclease-B-f | CACCGGAGTAGGGCTGAATGCGGC                                             |
| 22 | DNM1-Nuclease-B-r | AAACGCCGATTCAGCCCCTACTCC                                             |
| 23 | DNM1-S774A_mut_f  | CCGGACGCAGGGCGCCACGTCC                                               |
| 24 | DNM1-S774A_mut_r  | GGACGTGGGCGCCCTGCGTCCGG                                              |
| 25 | DNM1-S778A_mut_f  | CGCCACGTCCGCCCCACGCCGC                                               |
| 26 | DNM1-S778A_mut_r  | GCGGCGTGGGGCGGACGTGGGCG                                              |
| 27 | SNAP-f            | AATACGACTCACTATAGGGCGAATTGGGTACCGAATTCTGCCACCATGGACAA<br>AGACTGC     |
| 28 | SNAP-r            | GATCCAGCTCAGCCATGCTGCCTCCTGAACCTCCACCCAGCCAGGCTTGC                   |
| 29 | SNAP-CLCa-f       | GCAAGCCTGGGCTGGGTGGAGGTTAGGAGGCAGCATGGCTGAGCTGGATC                   |
| 30 | CLCa-r            | GGGAACAAAAGCTGGAGCTCCACCGCGGTGGCGGCCGCTCGACTTAGTGAC<br>CAGCGG        |
| 31 | mRuby2-f          | AATACGACTCACTATAGGGCGAATTGGGTACCGAATTCTGCCACCATGGTGT<br>TAAGGGC      |
| 32 | mRuby2-r          | GATCCAGCTCAGCCATGCTGCCTCCTGAACCTCCCTTGTACAGCTCGTC                    |
| 33 | MRuby2-CLCa-f     | GACGAGCTGTACAAGGGAGGTTAGGAGGCAGCATGGCTGAGCTGGATC                     |

892 Primers used for the assembly of the donor vectors for DNM1-EGFP (nr1-12), DNM2-  
893 mRuby2 (nr13-18), the nickase CRISPR/Cas9 guide RNA for DNM1 (nr19-22), DNM1 S774/8A  
894 mutagenesis (nr23 & 24) and for generation of the SNAP-CLCa and mRuby2-CLCa vectors  
895 (nr25-31). The donor DNA for DNM1-eGFP was assembled into the vector from five fragments:

896 i) left homology (LH) arm, ii) DNM1 C-terminal 19 amino acids together with a seven amino acid  
897 linker (C-assembly), iii) monomeric eGFP (GFP), iv) SV40 polyadenylation signal (pA) and v)  
898 the right homology arm (RH), which were amplified with forward (f) and reverse (r) primers, as  
899 indicated. Likewise, the donor DNA for DNM2-mRuby2 was assembled into the vector from  
900 three fragments: i) the left homology arm (LH), ii) mRuby2 and iii) the right homology arm (RH).  
901 Primers 19-20 were used to generate the guides A and B for the nickase CRISPR-CAS9 guide  
902 RNA targeting DNM1. Primers 25-31 were used to generate CLCa-SNAP tagged lentiviral  
903 vectors.

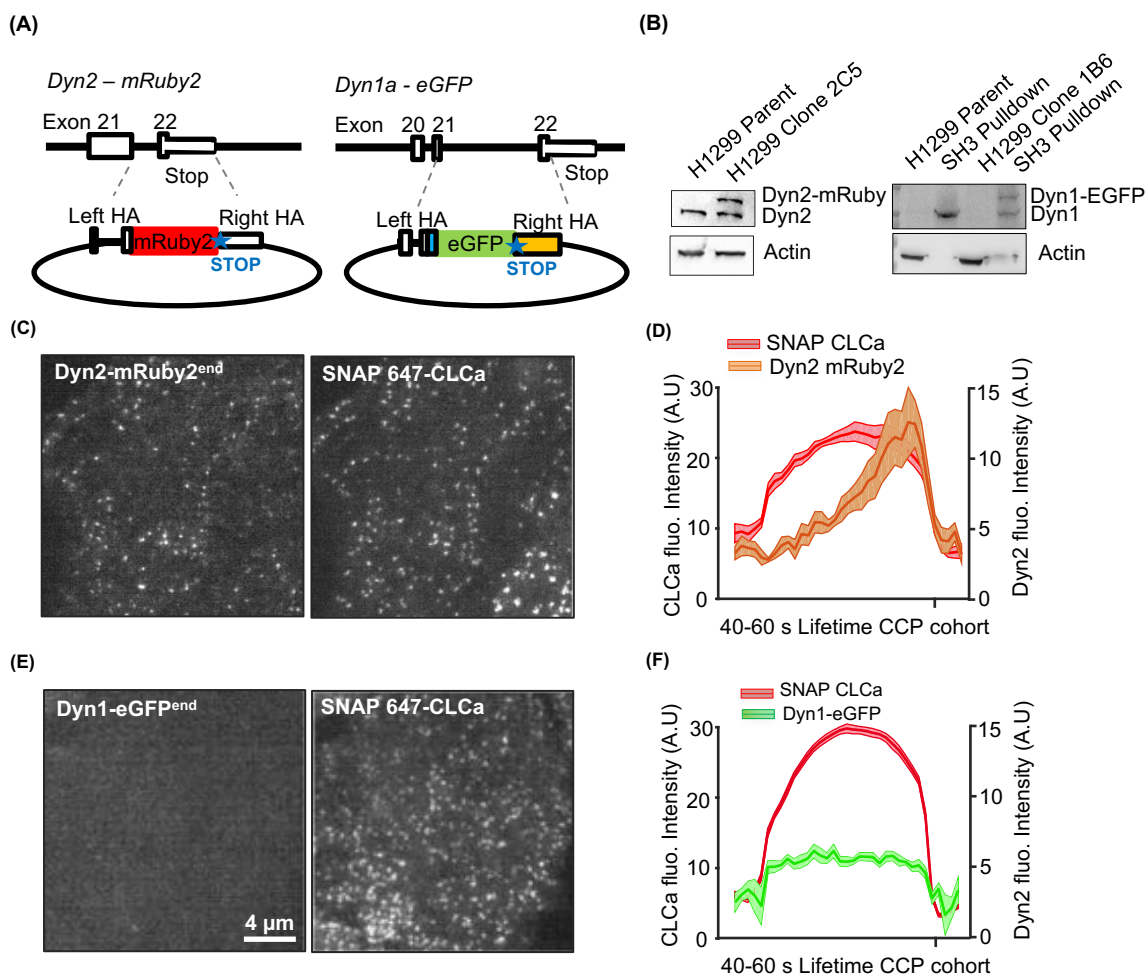

### Figure 1: Isoform-specific differences in recruitment of dynamin to CCPs

(A) Diagram of Zinc-finger and CRISPR-Cas9n knock-in strategies for endogenous labeling of Dyn2 and Dyn1 in H1299 cells with C-terminal mRuby2 and eGFP tags, respectively. For Dyn2, a short linker and mRuby2 (red) were placed at the stop codon in exon 22. For canonical Dyn1 splice isoform "a", the 19 C-terminal amino acids (blue) were inserted in exon 21, followed by a short linker, EGFP (green) with stop codon and a polyadenylation sequence (yellow). In both constructs flanking homology arms (HA) of roughly 800bp were used to promote recombination (dashed lines). See Figure S1 for details. (B) Western blot analysis of tagged isoforms. The low levels of Dyn1 in H1299 cells could not be directly detected by western blotting, but can be detected after pulldown with GST-Amphiphysin II SH3 domains. Representative TIRF images (see Supplemental Movies S1 and Movie S2) showing membrane recruitment of endogenous Dyn2-mRuby2<sup>end</sup> (C) or Dyn1a-eGFP<sup>end</sup> (E) and corresponding lentiviral transduced SNAP(647)-CLCa images. (D,F) Clathrin labeled puncta were identified and thresholded to define bona fide CCPs. Shown is the averaged kinetics of recruitment of SNAP-CLCa and Dyn2-mRuby2<sup>end</sup> (D) or Dyn1a-eGFP<sup>end</sup> (F) for all tracks with lifetimes between 40 and 60 sec (831 CCPs from 5 movies containing a total of 15 cells for Dyn2-mRuby2<sup>end</sup> and 13,346 CCPs from 10 movies containing a total of 29 cells for Dyn1a-eGFP<sup>end</sup>) is shown.

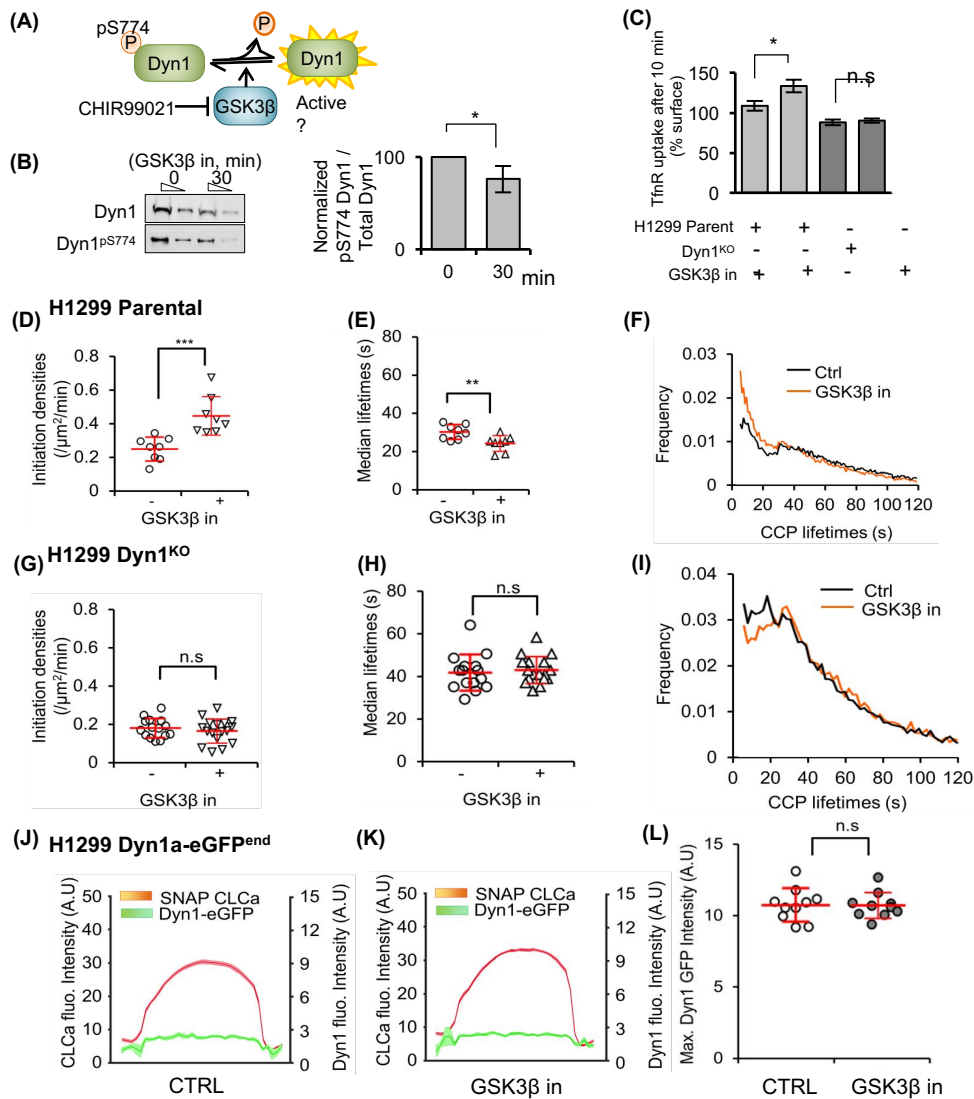

**Figure 2: Activated Dyn1 regulates early stages of CME, even when recruited at low levels to CCPs**

(A) Schematic representation of Dyn1 regulation by phosphorylation/dephosphorylation and activation upon GSK3 $\beta$  kinase inhibition (B) Dephosphorylation of Dyn1 S774 upon GSK3 $\beta$  inhibition by 20  $\mu\text{M}$  CHIR99021 observed by immunoblotting using a Dyn1 phospho-specific antibody and the quantification of pDyn1/Dyn1 intensity ratios (mean  $\pm$  S.D., n=3) (C) Transferrin receptor (TfnR) internalization efficiency of parental H1299 cells and Dyn1<sup>KO</sup> cells and their sensitivity to GSK3 $\beta$  inhibition (mean  $\pm$  S.D., n=3). (D) Initiation densities of bona fide CCPs and (E) their median lifetimes. Each dot represents the average value per movie, where each movie contained 1-5 cell (see Methods) (F) The distribution of CCP lifetimes measured in the absence or presence of GSK3 $\beta$  inhibitor. Data are derived from 10 movies each, 13346 CCPs of 40-60s lifetime were analyzed from 74807 bona fide CCPs and 13494 CCPs of 40-60s lifetime were analyzed from 75426 bona fide CCPs, respectively for control and GSK3 $\beta$  inhibition. Similarly, the initiation densities (G), median lifetime (H) and the lifetime distribution of bona fide CCPs (I) were analyzed for H1299 Dyn1<sup>KO</sup> cells with or without GSK3 $\beta$  inhibition. (J,K) Average recruitment of Dyn1a-eGFP<sup>end</sup> to CLCa-labeled CCPs with lifetimes of 40-60s measured in the absence (K) or presence (J) GSK3 $\beta$  inhibitor. (L) Maximum intensity of Dyn1a-eGFP<sup>end</sup> detected at any point throughout the lifetime of an individual CCPs measured in the absence or presence of GSK3 $\beta$  inhibitor. (\* p<0.05, \*\* p<0.01, \*\*\* p<0.001, see Methods for description of statistical analysis used in this and other figures)



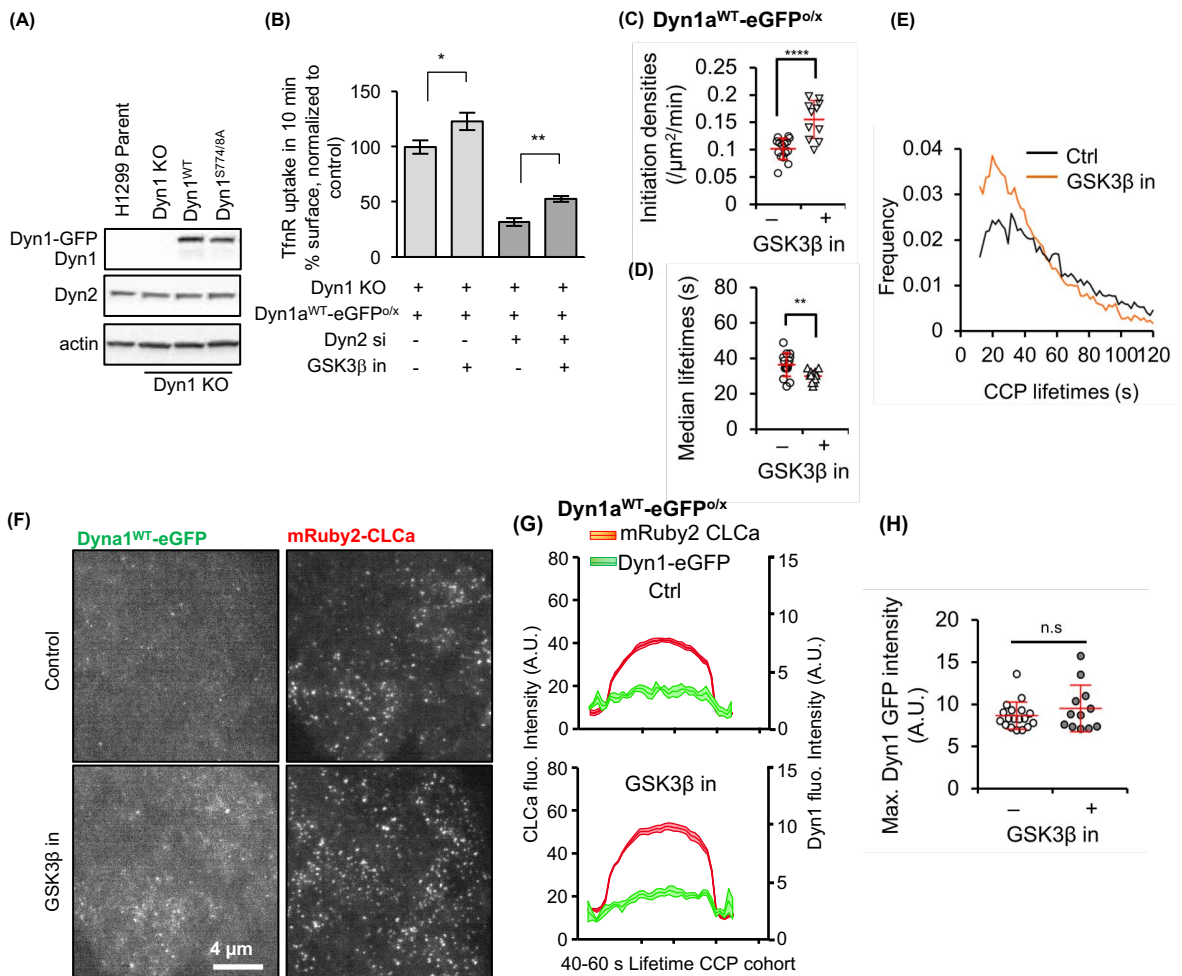

**Figure 3: Nonphosphorylatable Dyn1 mutant mimics GSK3β effect and can partially substitute for Dyn2**

(A) Western blot showing overexpression of Dyn1<sup>WT</sup>-eGFP or Dyn1<sup>S774/8A</sup>-eGFP in Dyn1<sup>KO</sup> H1299 cells. (B) Effect of siRNA knockdown of Dyn2 on Tfnr internalization in Dyn1<sup>KO</sup> cells reconstituted with Dyn1<sup>aWT</sup>-eGFP and treated or not with GSK3β inhibitor. Results are normalized to rates of endocytosis in parental H1299 cells. The data represents mean ± sem of n=3 experiments containing four replicates each (\*p<0.05, \*\*p<0.01). Initiation densities (C), median lifetimes (D) and the lifetime distribution (E) of bona fide CCPs analyzed in H1299 Dyn1<sup>KO</sup> cells reconstituted with Dyn1<sup>aWT</sup>-eGFP with or without GSK3β inhibition, determined as in Fig. 2. (F) Representative TIRF images of overexpressed Dyn1<sup>aWT</sup>-eGFP and mRuby2-CLCa and (G) quantification of the average recruitment of Dyn1<sup>aWT</sup>-eGFP to CCPs, identified by mRuby2-CLCa, with lifetimes between 40-60s (14495 CCPs from a pool of 100050 bona fide Dyn1 positive CCPs from 18 movies and 9651 CCPs from a pool of 68909 bona fide CCPs from 12 movies were analyzed from control and GSK3β, respectively). (H) Maximum Dyn1<sup>aWT</sup>-eGFP intensity averaged among individual bona fide CCP tracks in the absence or presence of GSK3β inhibitor.

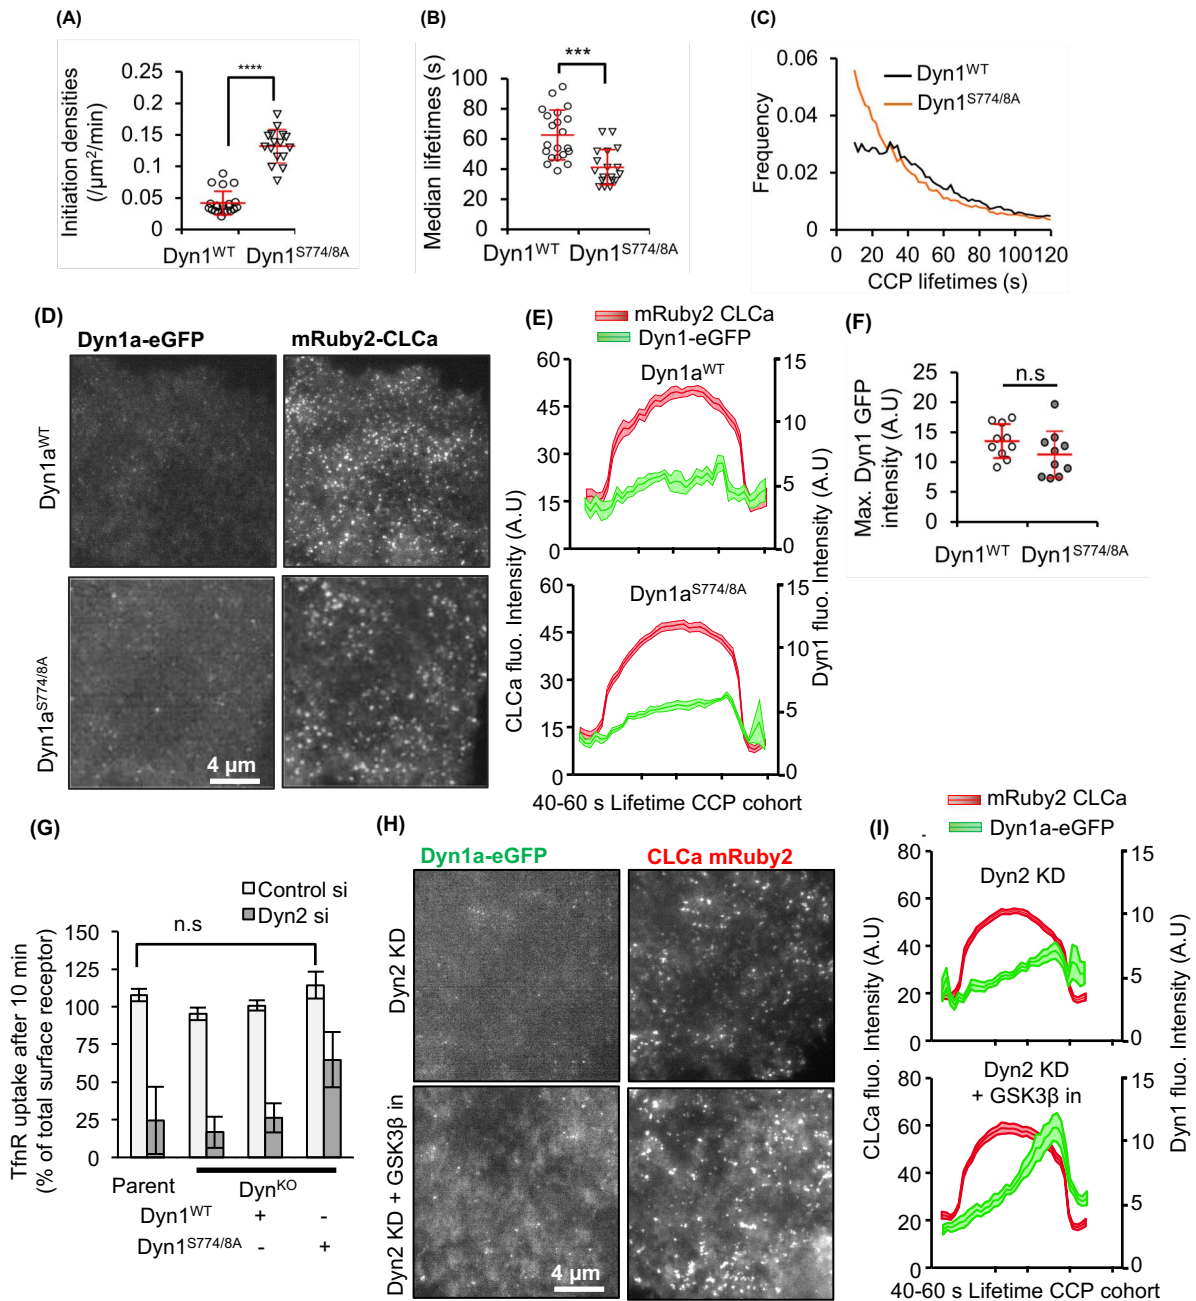

**Figure 4: Nonphosphorylatable Dyn1 mutant mimics GSK3 $\beta$  effects and can partially substitute for Dyn2**

CCP initiation densities (A), median lifetimes (B) and the lifetime distribution (C) of bona fide CCPs analyzed in H1299 Dyn1<sup>KO</sup> cells reconstituted with Dyn1<sup>WT</sup> or Dyn1<sup>S774/8A</sup>-eGFP, determined as described in Fig. 2. (D) Representative TIRF images of overexpressed Dyn1<sup>WT</sup>-eGFP or Dyn1<sup>S774/8A</sup>-eGFP and mRuby2-CLCa and (E) quantification of their average recruitment to CCPs with lifetimes between 40-60s. (F) Maximum intensities of Dyn1<sup>WT</sup>-eGFP or Dyn1<sup>S774/8A</sup>-eGFP averaged among individual bona fide CCP tracks. (G) Effect of siRNA knockdown of Dyn2 on TfnR endocytosis in parental and Dyn1<sup>KO</sup> H1299 cells and Dyn1<sup>KO</sup> cells reconstituted with either Dyn1<sup>WT</sup>-eGFP or Dyn1<sup>S774/8A</sup>-eGFP. (H) Representative TIRF images of Dyn2 siRNA-treated Dyn1<sup>KO</sup> cells overexpressing Dyn1<sup>WT</sup>-eGFP and mRuby2-CLCa treated or not with GSK3 $\beta$  inhibitor and (I) quantification of the average recruitment of Dyn1<sup>WT</sup>-eGFP to CCPs with lifetimes between 40-60s in Dyn2 knockdown cells treated or not with GSK3 $\beta$  inhibitor.

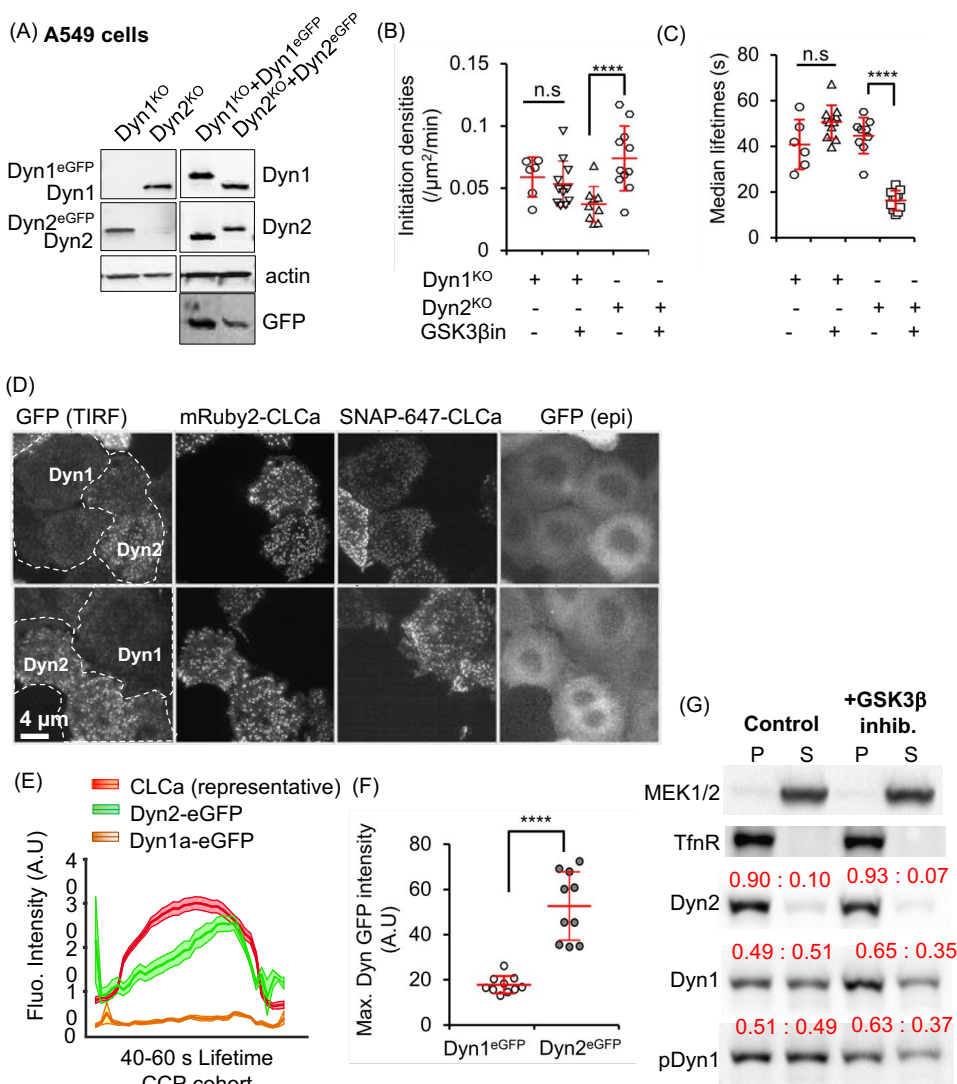

**Figure 5: Dyn1 and Dyn2 are differentially recruited to CCPs and differentially required for GSK3β-regulated CME**

(A) Immunoblot validation of Dyn1 and Dyn2 KO A549 cells and their corresponding reconstitution at near endogenous levels with eGFP-labelled Dyn1 or Dyn2. GFP blot shows that in A549 cells Dyn1 is expressed at ~5-fold higher levels than Dyn2. CCP initiation densities (B), and median lifetimes (C) in Dyn1 or Dyn2 knockout cells with or without GSK3β inhibition, determined as described in Fig. 1. (D) Representative TIRF and epifluorescent (epi) images of co-cultured Dyn1<sup>KO</sup>(Dyn1a-eGFP:SNAP-CLCa) and Dyn2<sup>KO</sup>(Dyn2-eGFP:mRuby2-CLCa) cells allowing direct comparison of Dyn1a-eGFP vs Dyn2-eGFP recruitment to CCPs in A549 cells. (E) Quantification of the average recruitment of Dyn1a-eGFP or Dyn2-eGFP to CCPs with lifetimes between 40-60s (4420 CCPs from a pool of 12555 Dyn1a-eGFP positive CCPs and 3961 CCPs from a pool of 12766 Dyn2-eGFP positive CCPs from a total of 11 movies were identified to have a lifetime between 40-60s). Data are obtained from cells co-imaged either for SNAP(647)-CLCa (and Dyn1a-eGFP) or mRuby-CLCa (and Dyn2-eGFP). (F) Maximum intensities of Dyn1a-eGFP or Dyn2-eGFP averaged among individual bona fide CCP tracks. (G) Subcellular fractionation of parental A549 cells into membrane (P) vs cytosolic (S) fractions and Western blotted for the indicated proteins. Cytosolic MEK1/2 and membrane-associated TfnR serve as controls for fractionation. Quantification is shown in red above each band as the fraction of total protein in the P vs S fraction. Results are representative of 3 independent experiments.

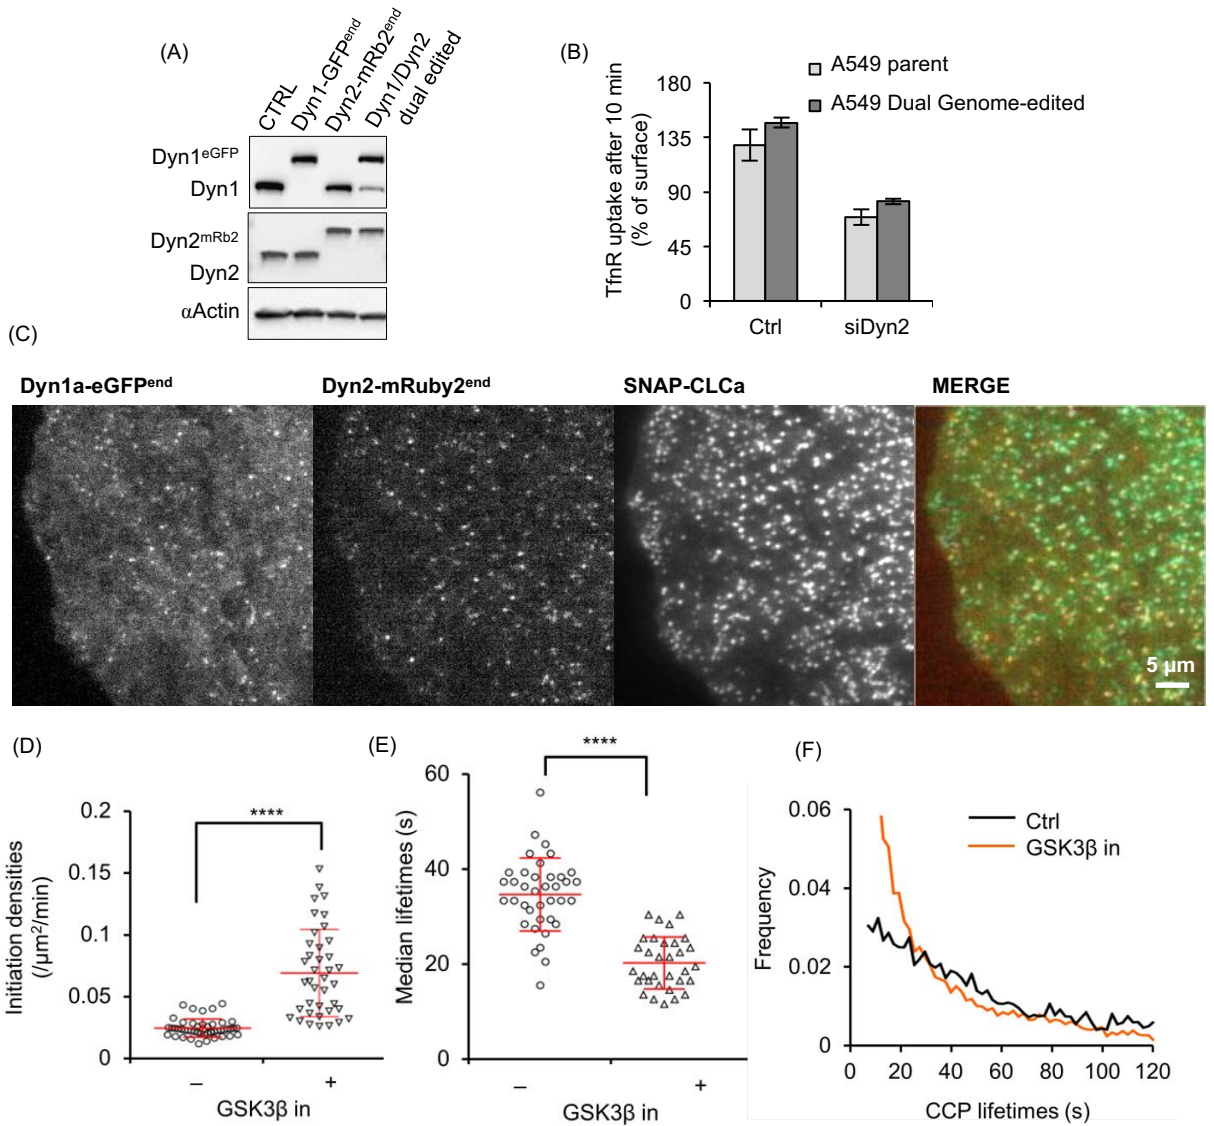

**Figure 6: Generation and characterization of dual genome-edited Dyn1a-eGFP and Dyn2-mRuby A549 cells**

(A) Immunoblot validation of Dyn1a-eGFP and Dyn2-mRuby2 single- and dual-genome edited A549 cells. (B) Tfnr endocytosis in dual genome edited A549 cells compared to parental A549 cells and their sensitivity to siRNA-mediated Dyn2 knockdown. (C) Representative TIRF images of Dyn1 and Dyn2 distribution relative to CLCa in dual genome-edited A549 cells. CCP initiation densities (D), median lifetimes (E) and the lifetime distribution (F) of bona fide CCPs in dual genome-edited A549 cells with or without GSK3 $\beta$  inhibition, determined as in Fig. 2.

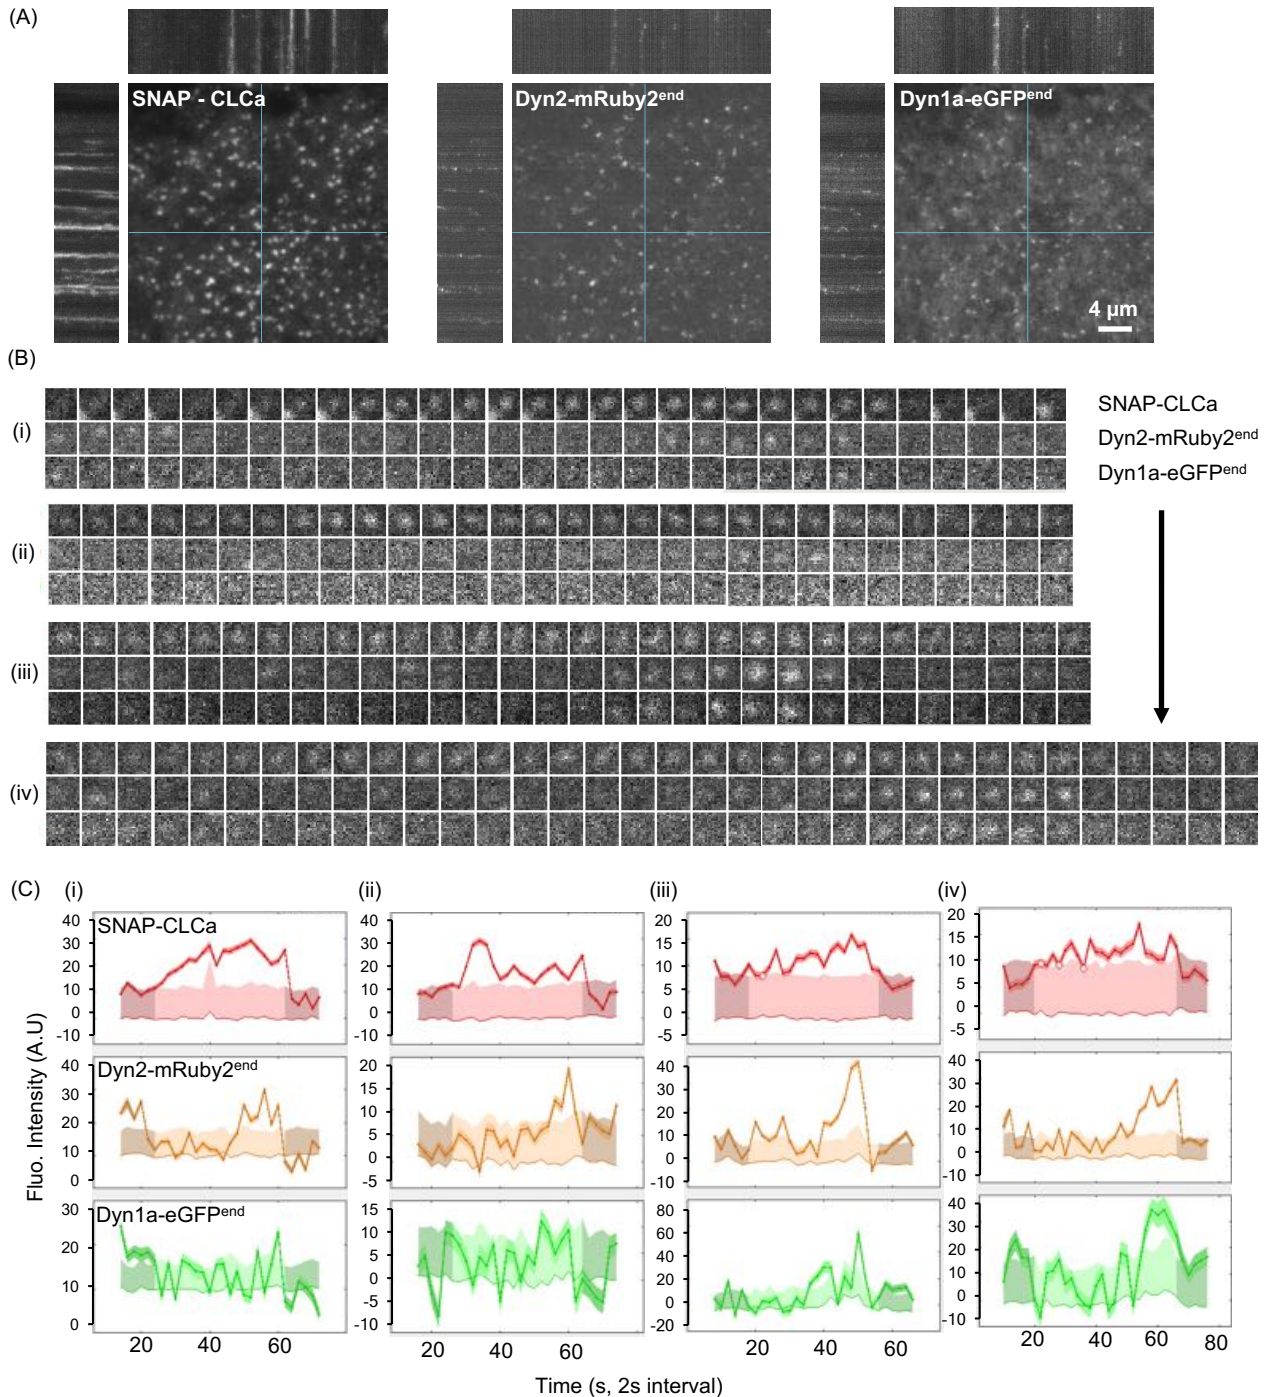

**Figure 7: Tracking clathrin and dynamins in dual genome-edited Dyn1a-eGFP and Dyn2-mRuby A549 cells**

(A) Representative TIRF images and corresponding kymographs of dynamic behavior of overexpressed SNAP-CLCa, Dyn2-mRuby<sup>end</sup>, and Dyn1a-eGFP<sup>end</sup> in dual genome-edited A549 cells. See Supplemental Movie S3. (B) Examples of Dyn1 and Dyn2 dynamics at individual CCPs (i-iv) and (C) their corresponding quantitative traces.

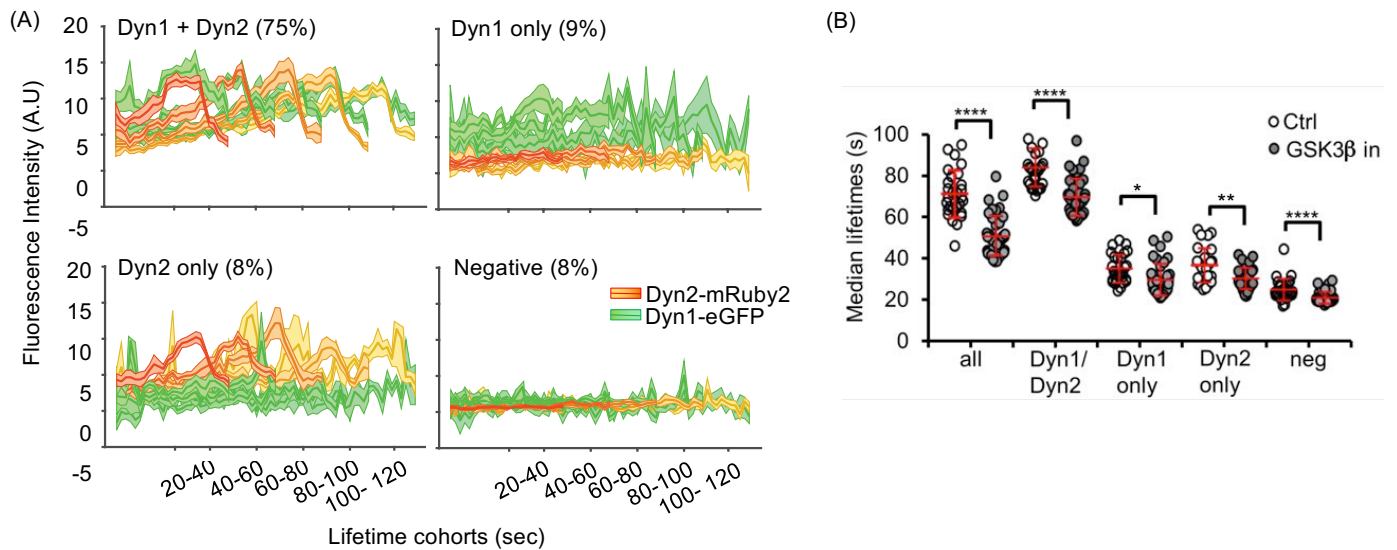

**Figure 8: Dyn1 and Dyn2 are recruited to same CCPs and Dyn1 activation alters the dynamics of all CCP subpopulations**

(A) Triple color, master/slave analyses of average dynamics of recruitment of Dyn2-mRuby<sup>endo</sup> and/or Dyn1a-eGFP<sup>endo</sup> to lifetime cohorts of SNAP-CLCa labeled CCPs identifies Dyn1/Dyn2 positive, Dyn1 only, Dyn2 only and Dyn1/2 negative subpopulations of CCPs. The percentage of detected CCPs in each class is indicated. (B) Effect of GSK3 $\beta$  inhibition on the median lifetimes of compositionally-distinct CCP subpopulations.

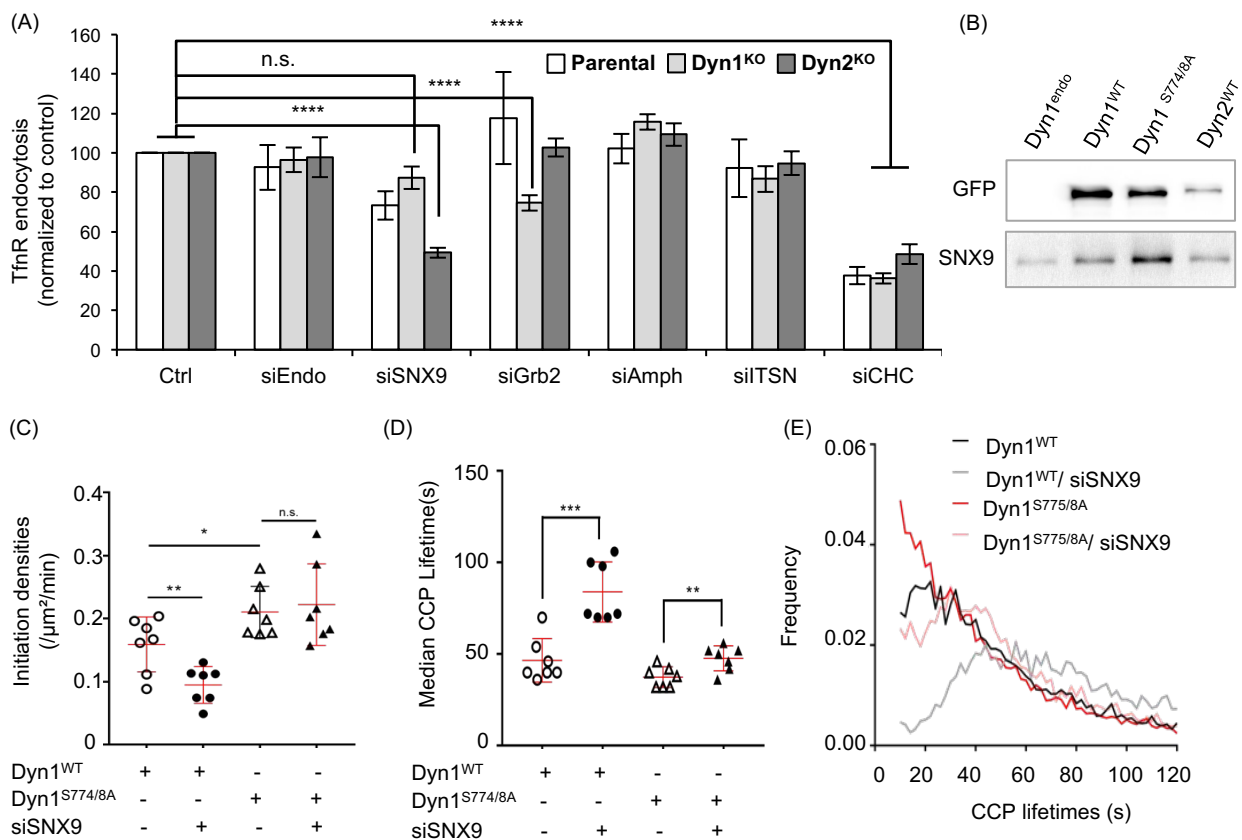

**Figure 9: SNX9 preferentially binds activated Dyn1 and is required for Dyn1-dependent changes in the lifetime distribution of CCPs.**

(A) Effect of siRNA knockdown of the indicated dynamin SH3 domain-containing endocytic accessory proteins on TfnR endocytosis in parental, Dyn1<sup>KO</sup> and Dyn2<sup>KO</sup> A549 cells. siEndo refers to siRNA knockdown of endophilin A1,2 and 3, siITSN refers to siRNA knockdown of intersectins 1 and 2, all others were single siRNAs. Knockdown efficiencies were determined to be >85% by western blotting. Data are normalized to the extent of TfnR uptake in control siRNA-treated parental, Dyn1<sup>KO</sup> and Dyn2<sup>KO</sup> cells, which is set to 100, to allow direct comparison of the relative effects of siRNA knockdowns. (B) eGFP pulldown of Dyn1a<sup>WT</sup>-eGFP, Dyn1a<sup>S774/8A</sup>-eGFP or Dyn2<sup>WT</sup>-eGFP expressed in Dyn1<sup>KO</sup> or Dyn2<sup>KO</sup> A549 cells, respectively using anti-eGFP nAbs. Parental cells that do not express an eGFP-tagged protein are used as control. The pulldown fractions were analyzed by immunoblot. Effect of SNX9 siRNA-mediated knockdown on (C) CCP initiation densities, (D) median lifetimes and (E) lifetime distribution of bona fide CCPs in Dyn1<sup>KO</sup> H1299 cells overexpressing either Dyn1a<sup>WT</sup>-eGFP or Dyn1a<sup>S774/8A</sup>-eGFP (data are derived from 7 movies for each condition with each movie consisting of 1-3 cells. Each data point is the average value from a single movie. (\* p < 0.05, \*\* p < 0.01, \*\*\* p < 0.001)

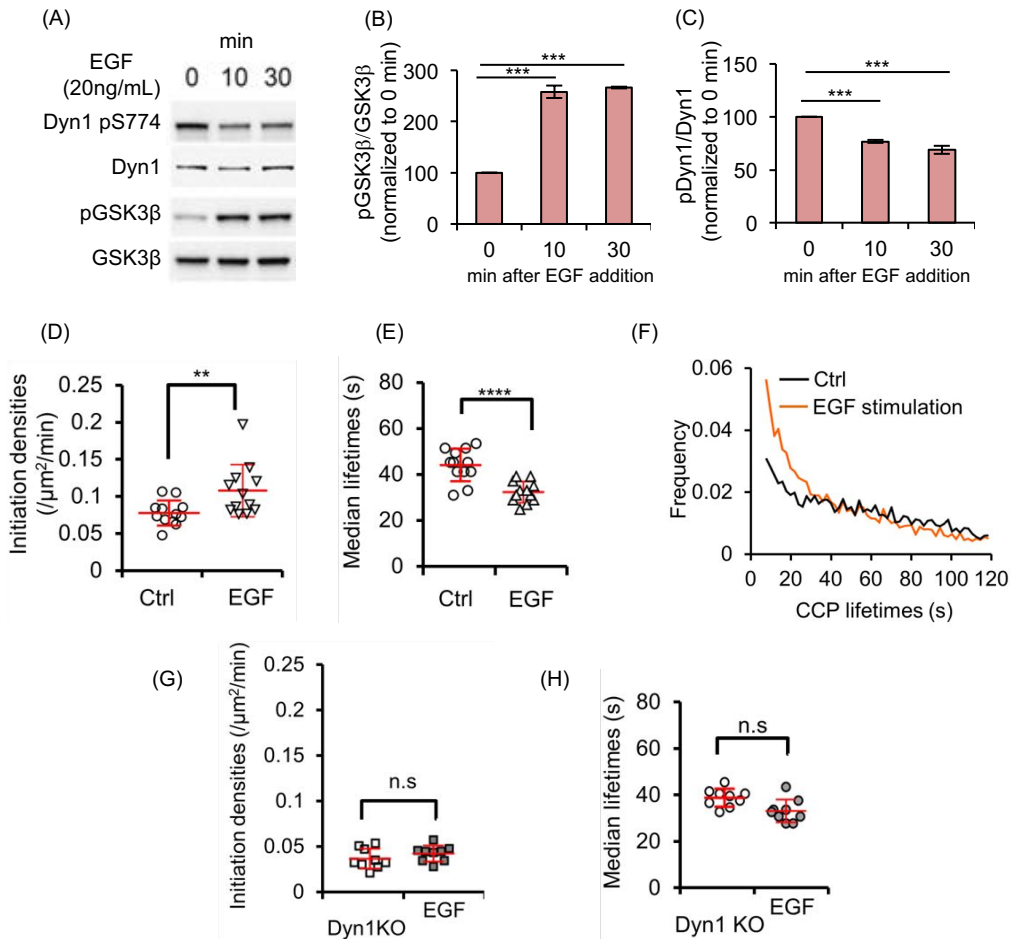

### Figure 10: EGF stimulation alters CCP dynamics in a Dyn1-dependent manner

(A) Immunoblot analysis of changes in phosphorylation state of Dyn1 S774 and GSK3β upon EGF stimulation of parental A549 cells. (B,C) Quantification of the EGF-triggered changes in phosphorylation state (i.e. ratio of phosphorylated/ total protein) of GSK3β and Dyn1 (mean  $\pm$  std. dev. of  $n=3$  experiments, data are normalized to 0 min time point). CCP initiation densities (D), median lifetimes (E) and the lifetime distribution (F) of bona fide CCPs in serum starved A549 cells before (Control, Ctrl) or after incubation with EGF (20 ng/ml) for 10 min prior to imaging. CCP initiation densities (G) and median lifetimes (H) in serum-starved Dyn1<sup>KO</sup> A549 cells before (Ctrl) or 10 min after incubation with EGF (EGF).



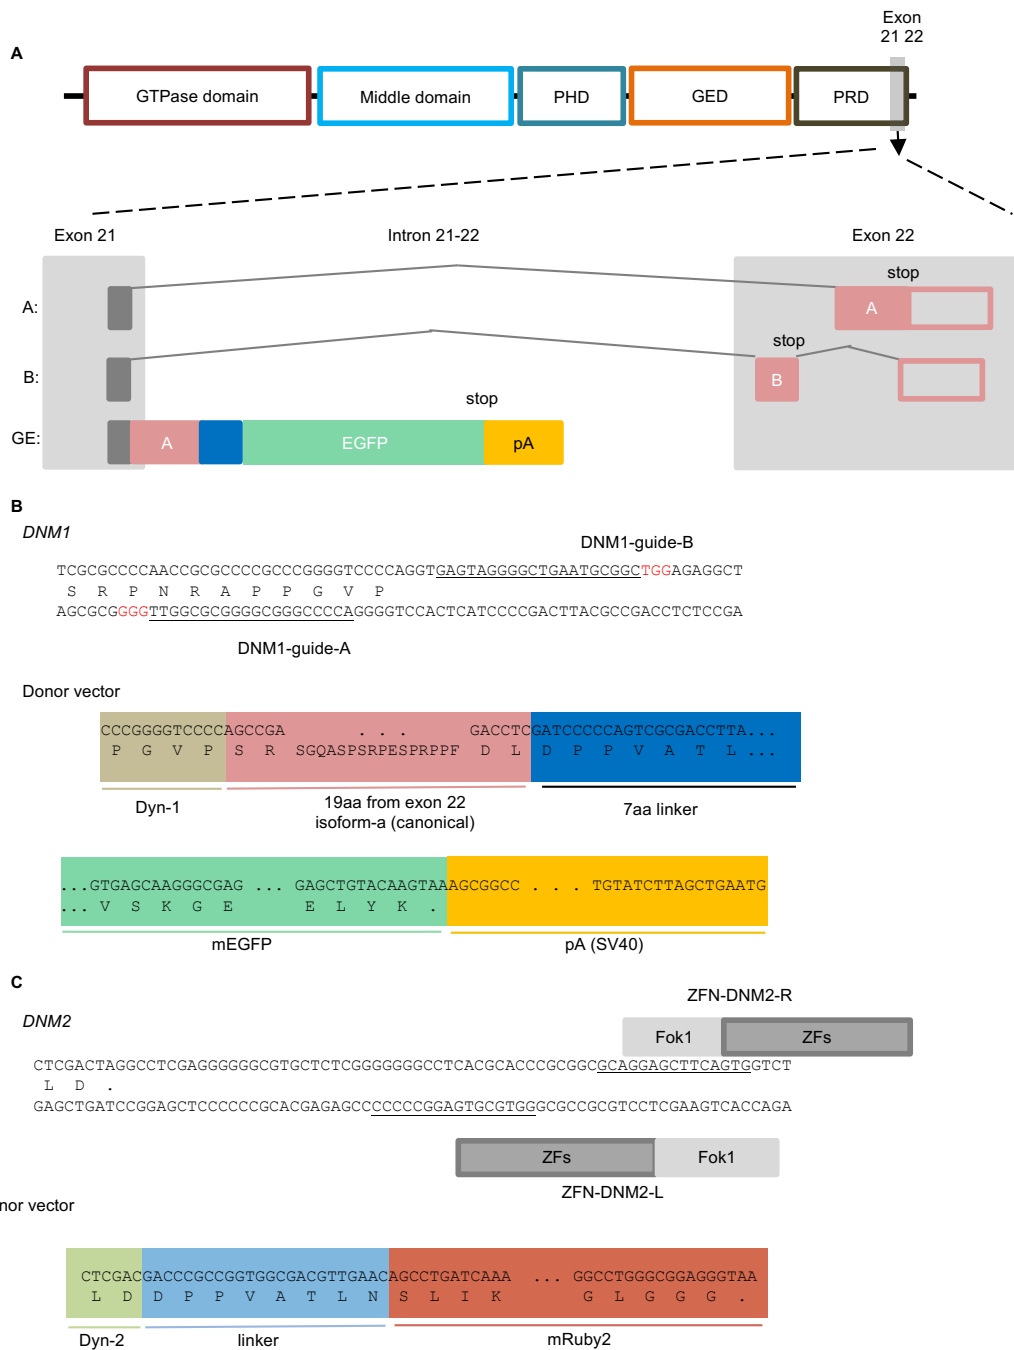

### Figure S1 Design strategies for genome-edited H1299 and A549 cells

(A) Domain and genomic structure of DNM1 illustrating the C-terminal splice variants to illustrate splice variants A and B derived from exons 21 and 22 (filled red box) and 3' UTR (open red box). To express the Dyn-1-EGFP fusion protein, the last 19 amino acids from splice variant A from exon 22 were introduced in frame in exon 21 (dark grey), followed by a 7 amino acid linker (blue), EGFP (green) and SV40 poly adenylation signal (orange). (B) Design of sgRNA guide A and B which targets the splice region in exon 21. The guide targeting sequences (underlined) and PAM sequences (red) are shown. For the donor vector, the DNA and amino acid sequences are shown for the junctions between exon 21, the inserted Dyn-1 C-term, the linker, EGFP and the poly adenylation signal. The color code is as in panel A. (C) Approach used for Zinc-finger nuclease-mediated genome-editing of DNM2, as previously described and the expected amino acid sequence for the Dyn2-mRuby2 fusion protein.

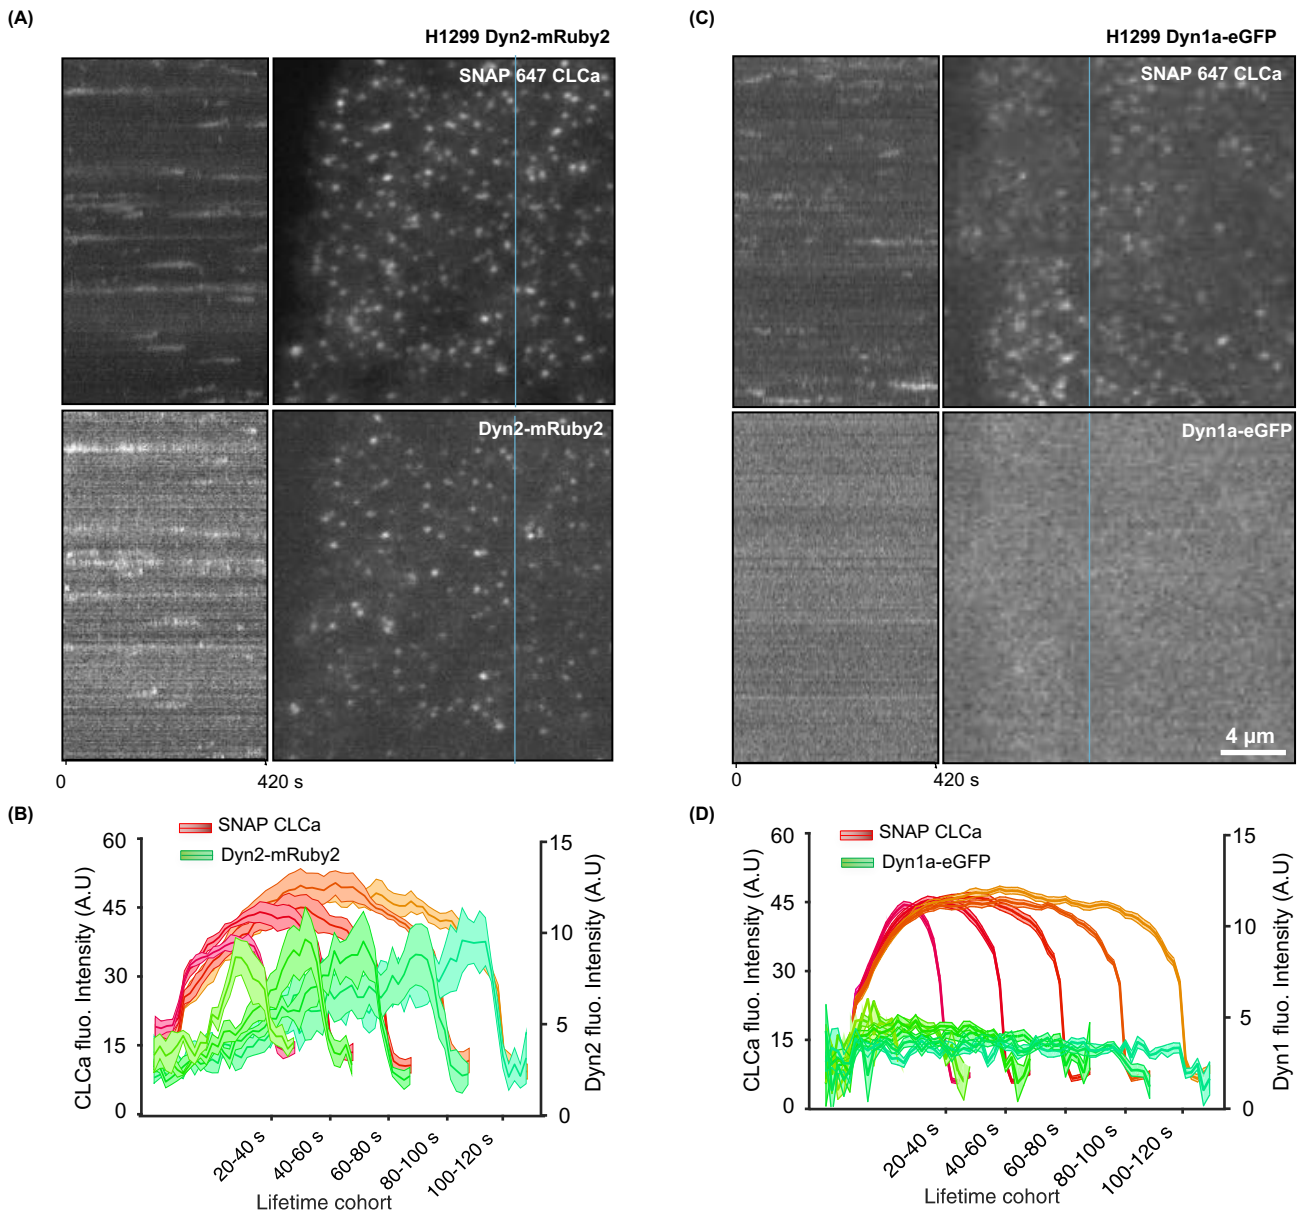

### Figure S2: Isoform-specific differences in recruitment of Dyn1 and Dyn2 to CCPs

(A, C) Representative TIRF image and corresponding kymograph of dynamic SNAP(647)-CLCa-labeled clathrin coated pits and Dyn2-mRuby<sup>end</sup> (A) or Dyn1a-eGFP<sup>end</sup> (B) in genome-edited H1299 cells. (B, D) Corresponding quantification of the averaged intensities of CLCa and Dyn2-mRuby<sup>end</sup> (B) or Dyn1a-eGFP<sup>end</sup> (D) recruitment for the indicated lifetime cohorts. Data from 6647 CCPs from 5 independent movies, containing a total of 15 cells (B) and data from 74805 CCPs from 10 independent movies, containing a total of 29 cells (D).

### H1299 Dyn1a-eGFP<sup>end</sup> cells

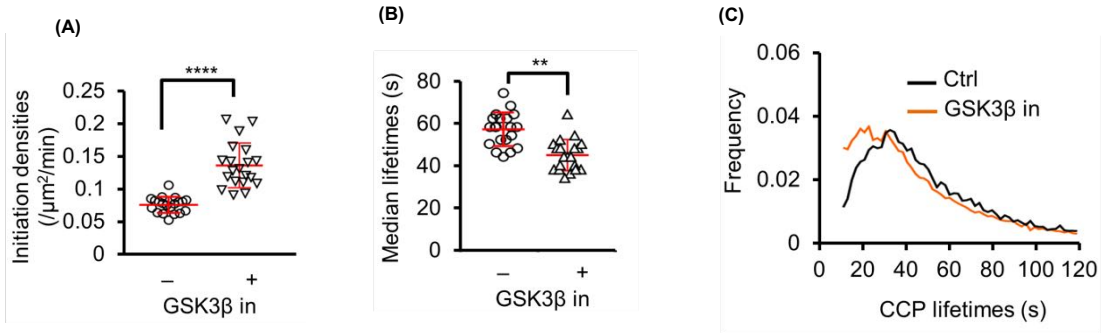

### Figure S3: CCP dynamics in genome-edited Dyn1a-eGFP H1299 cells

(A) CCP initiation rates (B) CCP lifetimes and (C) lifetime distributions of all CCPs in H1299 cells genome edited to express endogenously-tagged Dyn1a-eGFP. Each point represents the value derived from a single movie, with 2-4 cells/movie. (\*\*  $p \leq 0.01$ ; \*\*\*\*  $p \leq 0.0001$ )

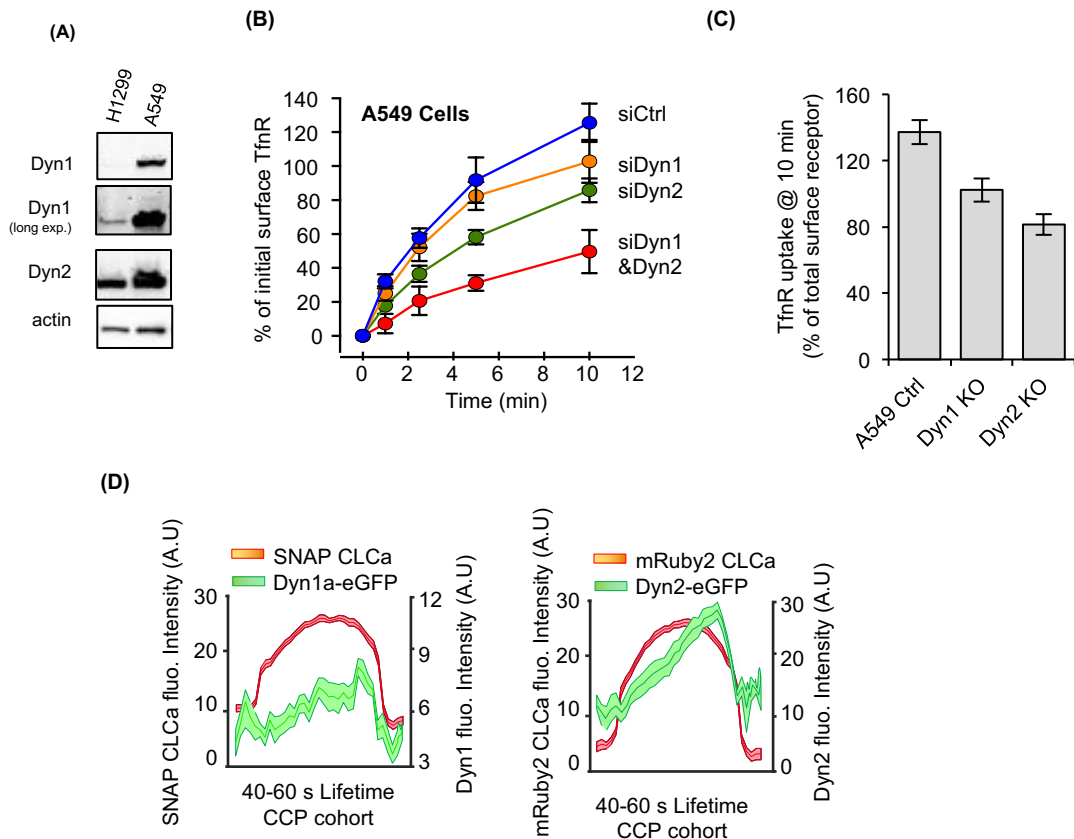

**Figure S4: Characterization of TfnR endocytosis and dynamin-isoform recruitment in A549 cells**

(A) Differential expression of Dyn1 vs. Dyn2 in H1299 vs. A549 cells. In H1299 cells Dyn2 is expressed at ~6-fold higher levels than Dyn1. In A549 cells Dyn1 is expressed at ~5-fold higher levels than Dyn2. (B) TfnR endocytosis in parental A549 cells treated with the indicated siRNAs. (C) TfnR uptake at 10 min in parental, Dyn1<sup>KO</sup> and Dyn2<sup>KO</sup> A549 cells. (D) Quantification of the average recruitment of Dyn1a-eGFP or Dyn2-eGFP to CCPs with lifetimes between 40-60s (4420 CCPs positive for Dyn1 and 3961 CCPs positive for Dyn2 were identified and analyzed from 11 movies containing 2-4 cells per movie), as in Figure 5E; however, the Dyn1a-eGFP data is rescaled to illustrate that Dyn1, like Dyn2 peaks at late stages of CME in these cells.

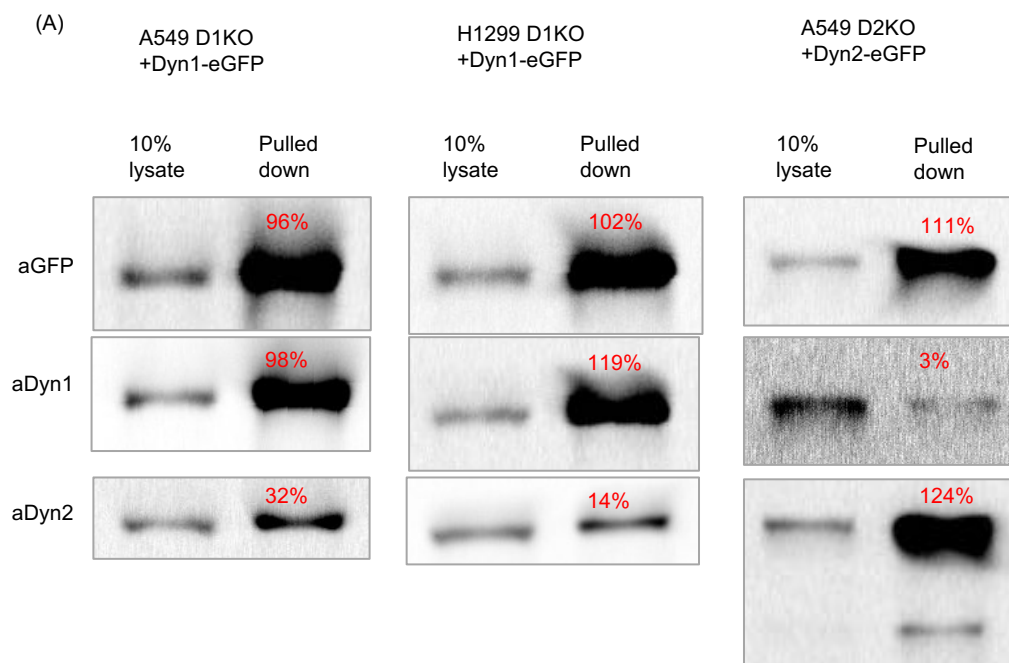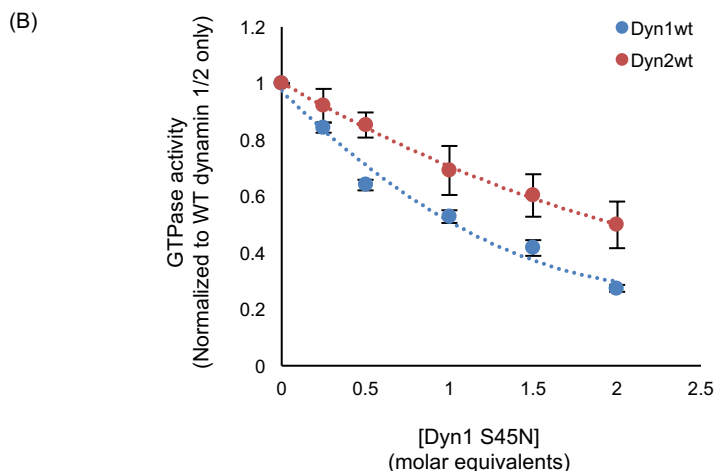

### Figure S5: Dynamins isoforms only weakly co-assemble

(A) Western blots and quantification (red) of bands showing extent of pulldown of Dyn1-eGFP or Dyn2-eGFP using anti-eGFP nAb-beads and co-immunoprecipitation of the other isoform. Data are representative of 3 independent experiments. (B) The inhibition of assembly stimulated GTPase activity of Dyn1 (blue) or Dyn2 (red) in the presence of increasing concentrations of GTPase-defective Dyn1<sup>S45N</sup>, which will inhibit assembly-stimulated GTPase activity by co-assembling with WT-dynamins on lipid nanotube templates.
